# Supplementary material for: High-pressure polymorphism inl-threonine between ambient pressure and 22 GPa
Source: Royal Society of Chemistry journal article supplement (doi:10.1039/c9ce00388f), 2019-01-01
Supplement: c9ce00388f1.xlsx [file c9ce00388f1.xlsx]

## Sheet: 2019_output_pressure_data
Refcode	Pressure reported in CSD	Converted value	Units	3D Coords?	Molecular?	Complex?
ESUWUM14	55.96 GPa	55.96	GPa	No	No
ESUWUM15	55.0 GPa	55	GPa	No	No
ESUWUM16	55.0 GPa	55	GPa	No	No
ESUWUM17	55.0 GPa	55	GPa	No	No
ESUWUM18	55.0 GPa	55	GPa	No	No
ESUWUM19	55.0 GPa	55	GPa	No	No
ESUWUM13	54.0 GPa	54	GPa	No	No
ESUWUM12	52.6 GPa	52.6	GPa	No	No
ESUWUM11	51.9 GPa	51.9	GPa	No	No
ESUWUM10	49.2 GPa	49.2	GPa	No	No
ESUWUM09	47.49 GPa	47.49	GPa	No	No
ESUWUM08	47.2 GPa	47.2	GPa	No	No
ESUWUM07	46.92 GPa	46.92	GPa	No	No
ESUWUM06	46.4 GPa	46.4	GPa	No	No
ESUWUM04	45.13 GPa	45.13	GPa	No	No
ESUWUM05	45.13 GPa	45.13	GPa	No	No
ESUWUM03	44.45 GPa	44.45	GPa	No	No
ESUWUM02	44.14 GPa	44.14	GPa	No	No
ESUWUM01	43.9 GPa	43.9	GPa	No	No
OSAVAH23	43.2 GPa	43.2	GPa	Yes	No
ESUWUM	41.2 GPa	41.2	GPa	No	No
ESUWUM20	41.0 GPa	41	GPa	No	No
ESUWUM21	41.0 GPa	41	GPa	No	No
MIBHIR	40.0 GPa	40	GPa	Yes	No
ETAFOW04	39.05 GPa	39.05	GPa	No	No
ETAFOW05	39.0 GPa	39	GPa	No	No
ETAFOW03	38.5 GPa	38.5	GPa	No	No
OSAVAH21	37.6 GPa	37.6	GPa	Yes	No
ETAFOW02	36.3 GPa	36.3	GPa	No	No
ESUWUM22	36.2 GPa	36.2	GPa	No	No
OSAVAH22	35.2 GPa	35.2	GPa	Yes	No
OSAVAH24	33.3 GPa	33.3	GPa	Yes	No
ETAFOW01	30.6 GPa	30.6	GPa	No	No
ETAHOY	28.62 GPa	28.62	GPa	No	No
SACBAA	at 28 GPa	28	GPa	Yes	Yes	No
SACBAA01	at 28 GPa	28	GPa	Yes	Yes	No
OSAVAH19	27.6 GPa	27.6	GPa	Yes	No
BENZEN09	at 24 GPa	24	GPa	No	Yes
OSAVAH18	22.3 GPa	22.3	GPa	Yes	No
OSAVAH16	20.4 GPa	20.4	GPa	Yes	No
ETAHIS	19.19 GPa	19.19	GPa	No	No
ETAHEO	18.82 GPa	18.82	GPa	No	No
NIFQUR	18500000.0 kPa	18.5	GPa	Yes	No
ETAHAK	18.37 GPa	18.37	GPa	No	No
OSAVAH14	15.4 GPa	15.4	GPa	Yes	No
SACBAA03	15 GPa	15	GPa	No	Yes
ETAGUD	14.4 GPa	14.4	GPa	No	No
ESUWUM23	14.20 GPa	14.2	GPa	No	No
HQUACN20	14.1 GPa	14.1	GPa	Yes	Yes	Yes
LALNIN51	at 13.60 GPa	13.6	GPa	Yes	Yes	Yes
NONWES30	13560000.0 kPa	13.56	GPa	Yes	Yes
LILRIJ06	13.0 GPa	13	GPa	Yes	Yes
NONWES31	12710000.0 kPa	12.71	GPa	Yes	Yes
BIHXIC18	12.675 GPa	12.675	GPa	Yes	Yes
BENZEN08	at above 12 GPa	12	GPa	No	Yes
HQUACN19	12.0 GPa	12	GPa	Yes	Yes
BIHXIC17	11.98 GPa	11.98	GPa	Yes	Yes
NONWES15	11980000.0 kPa	11.98	GPa	Yes	Yes
KAHQUI02	11.8 GPa	11.8	GPa	Yes	No
NONWES32	11780000.0 kPa	11.78	GPa	Yes	Yes
LALNIN50	at 11.74 GPa	11.74	GPa	Yes	Yes
FAPBIH12	11.69 GPa	11.69	GPa	Yes	Yes
EJIQEU02	at 11.6GPa	11.6	GPa	Yes	Yes
FEROCE38	11.60 GPa	11.6	GPa	Yes	Yes
IZAKAX	11.48 GPa	11.48	GPa	Yes	No
LILRIJ05	11.1 GPa	11.1	GPa	Yes	Yes
HQUACN13	11.0 GPa	11	GPa	Yes	Yes
BIJBUU	10.665 GPa	10.665	GPa	Yes	Yes
WUVSAH06	10.66 GPa	10.66	GPa	Yes	Yes
UJIXOC04	106.2 kbar	10.62	GPa	Yes	Yes
GEHMAK05	10.5 GPa	10.5	GPa	Yes	Yes
NONWES33	10340000.0 kPa	10.34	GPa	Yes	Yes
FAPBIH11	10.26 GPa	10.26	GPa	Yes	Yes
UJIXOC03	102.2 kbar	10.22	GPa	Yes	Yes
ADMANN25	10130000.0 kPa	10.13	GPa	No	Yes
EPIVEF04	10.1 GPa	10.1	GPa	Yes	Yes
LALNIN49	at 9.87 GPa	9.87	GPa
NONWES58	9860000.0 kPa	9.86	GPa
FAWFOY17	9.80 GPa	9.8	GPa
LILRIJ04	9.8 GPa	9.8	GPa
UJIXOC02	97.9 kbar	9.79	GPa
NONWES16	9740000.0 kPa	9.74	GPa
ACUWUQ03	at 9710000 kPa	9.71	GPa
BIHXIC16	9.685 GPa	9.685	GPa
FAPBIH10	at 9650000 kPa	9.65	GPa
FEROCE41	9600000.0 kPa	9.6	GPa
OSAVAH15	9.6 GPa	9.6	GPa
FEROCE36	9.55 GPa	9.55	GPa
ADMANN24	9540000.0 kPa	9.54	GPa
FEROCE40	9520000.0 kPa	9.52	GPa
BCBANN06	9500000.0 kPa	9.5	GPa
BCBANN17	9500000.0 kPa	9.5	GPa
EPATEW	9.50 GPa	9.5	GPa
NAKCIN01	9400000.0 kPa	9.4	GPa
SOGFOL10	at 9400000.0 kPa	9.4	GPa
LALNIN48	at 9.39 GPa	9.39	GPa
UJIXOC01	93.9 kbar	9.39	GPa
ADMANN23	9370000.0 kPa	9.37	GPa
MACUFR15	9.37 GPa	9.37	GPa
NEBGUX04	at 9.37 GPa	9.37	GPa
HQUACN12	9.3 GPa	9.3	GPa
BIHXIC15	9.23 GPa	9.23	GPa
ADMANN22	9200000.0 kPa	9.2	GPa
ADMANN20	9000000.0 kPa	9	GPa
FEROCE35	8.99 GPa	8.99	GPa
NONWES85	8960000.0 kPa	8.96	GPa
IZOXOL08	at 8.91GPa	8.91	GPa
EPANIU12	8.90 GPa	8.9	GPa
MEHNIY07	8.9 GPa	8.9	GPa
ACUWUQ02	at 8880000 kPa	8.88	GPa
LALNIN47	at 8.82 GPa	8.82	GPa
ADMANN19	8770000.0 kPa	8.77	GPa
IZOPUK	8600000.0 kPa	8.6	GPa
RAZBAY03	8.6 GPa	8.6	GPa
FAWFOY16	8.55 GPa	8.55	GPa
GEHMAK04	8.5 GPa	8.5	GPa
MACUFR19	8.48 GPa	8.48	GPa
BAMZUN07	8.4 GPa	8.4	GPa
BUQGUQ03	at 8.40 GPa	8.4	GPa
EDUTAB14	8.35 GPa	8.35	GPa
FEROCE84	8350000.0 kPa	8.35	GPa
ADMANN18	8290000.0 kPa	8.29	GPa
VUZLOT04	8.28 GPa	8.28	GPa
ACUWUQ01	at 8260000 kPa	8.26	GPa
BENZEN24	8.2 GPa	8.2	GPa
DLSERN19	at 8.2 Gpa	8.2	GPa
FAPBIH09	at 8190000 kPa	8.19	GPa
LSERIN40	at 8.162GPa	8.162	GPa
FEROCE44	8150000.0 kPa	8.15	GPa
FOKNEY15	at 8.14 GPa	8.14	GPa
LSERIN25	at 8.1 GPa	8.1	GPa
FEROCE83	8090000.0 kPa	8.09	GPa
HQUACN18	8.07 GPa	8.07	GPa
NONWES99	8040000.0 kPa	8.04	GPa
BALNIN05	8030000.0 kPa	8.03	GPa
LALNIN46	at 8.03 GPa	8.03	GPa
ADMANN21	8010000.0 kPa	8.01	GPa
EDUTAB13	8.00 GPa	8	GPa
LSERIN21	at 8 GPa	8	GPa
AFUDEL10	at 7.97GPa	7.97	GPa
NAOXAL20	at 7.97 GPa	7.97	GPa
BCBANN05	7950000.0 kPa	7.95	GPa
BCBANN16	7950000.0 kPa	7.95	GPa
SOGFOL08	at 7940000 kPa	7.94	GPa
NONWES84	7920000.0 kPa	7.92	GPa
ZOSXOW	at 7.9 GPa	7.9	GPa
LEFJAH09	at 7.89 GPa	7.89	GPa
NUDPAE12	7.87 GPa	7.87	GPa
BIHXIC14	7.85 GPa	7.85	GPa
GLYCIN62	at 7.8 GPa	7.8	GPa
IZOXOL07	at 7.80GPa	7.8	GPa
KICCOO12	at 7.8 GPa	7.8	GPa
MUTKUH08	at 7.80 GPa	7.8	GPa
BCBANN12	7.7 GPa	7.7	GPa
BCBANN18	7.7 GPa	7.7	GPa
EPIVEF03	7.7 GPa	7.7	GPa
GATLES09	at 7680000 kPa	7.68	GPa
GATLES10	at 7680000 kPa	7.68	GPa
MACUFR18	7.54 GPa	7.54	GPa
EDUTAB12	7.50 GPa	7.5	GPa
ACUWUQ11	7490000.0 kPa	7.49	GPa
GLYCIN40	at 7.46 GPa	7.46	GPa
RAZBAY01	7.45 GPa	7.45	GPa
UJIXOC	74.2 kbar	7.42	GPa
NONWES57	7410000.0 kPa	7.41	GPa
EPANIU11	7.40 GPa	7.4	GPa
FAWFOY15	7.40 GPa	7.4	GPa
GEHMAK03	7.4 GPa	7.4	GPa
EPZBNI01	at 7400000.0 kPa	7.4	GPa
FEROCE45	7400000.0 kPa	7.4	GPa
BECRUX06	7.32 GPa	7.32	GPa
ETAGOX	7.31 GPa	7.31	GPa
GATLES08	at 7310000 kPa	7.31	GPa
GATLES18	at 7310000.0 kPa	7.31	GPa
BAZGOY04	at 7.3GPa	7.3	GPa
LSERIN24	at 7.3 GPa	7.3	GPa
LSERIN39	at 7.243GPa	7.243	GPa
AFUDEL08	at 7.23GPa	7.23	GPa
ACRLAC14	7.21 GPa	7.21	GPa
FIKKOC12	7160000.0 kPa	7.16	GPa
NONWES98	7140000.0 kPa	7.14	GPa
FAPBIH08	at 7130000 kPa	7.13	GPa
FOKNEY14	at 7.12 GPa	7.12	GPa
NAOXAL03	at 7.12 GPa	7.12	GPa
QQQCIG30	7.12 GPa	7.12	GPa
BOQQUT08	at 7100000 kPa	7.1	GPa
GLYCIN41	at 7.10 GPa	7.1	GPa
KICCOO11	at 7.1 GPa	7.1	GPa
EDUTAB11	7.00 GPa	7	GPa
VUZLOT08	7 GPa	7	GPa
ACUXAX08	at 6970000.0 kPa	6.97	GPa
IJALUC	69.5 kbar	6.95	GPa
BAMZUN06	6.9 GPa	6.9	GPa
EKESAQ03	6.9 GPa	6.9	GPa
IFIZIG09	at 6.9GPa	6.9	GPa
VONBUX02	at 6.9 GPa	6.9	GPa
NONWES97	6870000.0 kPa	6.87	GPa
RAZBAY02	6.86 GPa	6.86	GPa
QUTQIH11	6850000.0 kPa	6.85	GPa
CABCUD25	6830000.0 kPa	6.83	GPa
NONWES94	6810000.0 kPa	6.81	GPa
CARZIF09	at 6.80 GPa	6.8	GPa
CYSTAC08	at 6.8 GPa	6.8	GPa
LEFJAH08	at 6.77 GPa	6.77	GPa
MACUFR17	6.77 GPa	6.77	GPa
GLYCIN42	at 6.72 GPa	6.72	GPa
FAWFOY14	6.70 GPa	6.7	GPa
RAZBAY	6.7 GPa	6.7	GPa
FEROCE46	6690000.0 kPa	6.69	GPa
FIKKOC11	6670000.0 kPa	6.67	GPa
LALNIN44	at 6.65 GPa	6.65	GPa
LSERIN50	6640000.0 kPa	6.64	GPa
LSERIN51	6640000.0 kPa	6.64	GPa
ACRLAC13	6.63 GPa	6.63	GPa
ICESUH	6630000.0 kPa	6.63	GPa
KICCOO10	at 6.6 GPa	6.6	GPa
SOGFOL06	at 6600000 kPa	6.6	GPa
EPANIU10	6.56 GPa	6.56	GPa
TAWTAM04	at 6550000.0 kPa	6.55	GPa
NONWES93	6540000.0 kPa	6.54	GPa
DANTEN11	at 6.5 GPa	6.5	GPa
MIGPAU01	at 6.5 GPa	6.5	GPa
FAPBIH07	at 6470000 kPa	6.47	GPa
GLYCIN61	at 6.47 GPa	6.47	GPa
ASUQAI	6.45 GPa	6.45	GPa
NUDPAE11	6.45 Gpa	6.45	GPa
EDUTAB10	6.44 GPa	6.44	GPa
CEGFEA14	at 6.4 GPa	6.4	GPa
IFIZIG08	at 6.4 GPa	6.4	GPa
BALNIN03	6300000.0 kPa	6.3	GPa
NAKCIN08	6300000.0 kPa	6.3	GPa
LSERIN38	at 6.28GPa	6.28	GPa
XELLUY	6.26 GPa	6.26	GPa
ACUWUQ10	6250000.0 kPa	6.25	GPa
AFUDEL09	at 6.25GPa	6.25	GPa
MUTKUH07	at 6.22 GPa	6.22	GPa
EKESIY10	6.2 GPa	6.2	GPa
GLYCIN64	at 6.2 GPa	6.2	GPa
NIRJII07	at 6.2 GPa	6.2	GPa
RAYZEZ03	6.2 GPa	6.2	GPa
VOFVAN26	at 6.2 GPa	6.2	GPa
ZOSXOU	at 6.2 GPa	6.2	GPa
BALNIN04	6200000.0 kPa	6.2	GPa
GLUCSA22	6200000.0 kPa	6.2	GPa
BIHXIC13	6.165 GPa	6.165	GPa
JEFNUG10	6.16 GPa	6.16	GPa
ASUQAI21	6.15 GPa	6.15	GPa
ACUXAX07	at 6130000.0 kPa	6.13	GPa
BAMZUN05	6.1 GPa	6.1	GPa
CABCUD15	6100000.0 kPa	6.1	GPa
CABCUD24	6100000.0 kPa	6.1	GPa
FIDYUP01	6.1 GPa	6.1	GPa
GLYCIN43	at 6.10 GPa	6.1	GPa
KICCOO09	at 6.1 GPa	6.1	GPa
MEHNIY06	6.1 GPa	6.1	GPa
VASZAT02	6.1 GPa	6.1	GPa
BOJKAM09	6.07 GPa	6.07	GPa
HQUACN17	6.06 GPa	6.06	GPa
NALCYS28	6050000.0 kPa	6.05	GPa
NONWES92	6050000.0 kPa	6.05	GPa
QQQCVS13	6.05 GPa	6.05	GPa
SOGFOL05	at 6040000 kPa	6.04	GPa
ACRLAC12	6.03 GPa	6.03	GPa
NUDPAE10	6.02 GPa	6.02	GPa
QUTQIH10	6010000.0 kPa	6.01	GPa
ABULIT07	at 6.0 GPa	6	GPa
CARZIF08	at 6.0 GPa	6	GPa
DANTEN10	at 6.0 GPa	6	GPa
DLALNI21	at 6.0 GPa	6	GPa
FIKKOC10	6000000.0 kPa	6	GPa
LILRIJ03	6.0 GPa	6	GPa
NTROMA12	at 6.0 GPa	6	GPa
NAOXAL06	at 5.99 GPa	5.99	GPa
NEDMIS07	5980000.0 kPa	5.98	GPa
FEROCE47	5970000.0 kPa	5.97	GPa
MACUFR16	5.96 GPa	5.96	GPa
JAYDUI06	5930000.0 kPa	5.93	GPa
SALOXM09	at 5.93 Gpa	5.93	GPa
ASUQAI20	5.91 GPa	5.91	GPa
IQOMIM20	5910000.0 kPa	5.91	GPa
QQQCIG29	5.91 GPa	5.91	GPa
EKESIY09	5.9 GPa	5.9	GPa
LALNIN33	at 5.9 GPa	5.9	GPa
LEFJAH07	at 5.9 GPa	5.9	GPa
QQQAUG17	at 5.9 GPa	5.9	GPa
BOQQUT07	at 5900000 kPa	5.9	GPa
ETHANE11	5900000.0 kPa	5.9	GPa
EDUTAB09	5.83 GPa	5.83	GPa
GLYCIN39	at 5.83 GPa	5.83	GPa
GLYCIN52	at 5.83 GPa	5.83	GPa
RAYZEZ02	5.82 GPa	5.82	GPa
BCBANN04	5800000.0 kPa	5.8	GPa
BCBANN15	5800000.0 kPa	5.8	GPa
CYSTAC07	at 5.8 GPa	5.8	GPa
FOKNEY13	at 5.80 GPa	5.8	GPa
GLUCSA21	5800000.0 kPa	5.8	GPa
IFIZIG07	at 5.8 GPa	5.8	GPa
LSERMH17	at 5.8 GPa	5.8	GPa
MIGPAU07	at 5.8 GPa	5.8	GPa
DUCKOB09	5790000.0 kPa	5.79	GPa
IZOXOL06	at 5.77GPa	5.77	GPa
SOGFOL09	at 5770000.0 kPa	5.77	GPa
NONWES91	5750000.0 kPa	5.75	GPa
CTMTNA06	at 5.70GPa	5.7	GPa
FAWFOY13	5.70 GPa	5.7	GPa
FIDYUP	5.7 GPa	5.7	GPa
LSERIN37	at 5.700GPa	5.7	GPa
BECRUX05	5.69 GPa	5.69	GPa
QQQCCY15	5.69 GPa	5.69	GPa
XELFEC27	5.66 GPa	5.66	GPa
FIKKOC09	5630000.0 kPa	5.63	GPa
CEGFEA13	at 5.6 GPa	5.6	GPa
EKESAQ02	5.6GPa	5.6	GPa
EPANIU09	5.60 GPa	5.6	GPa
KICCOO08	at 5.6 GPa	5.6	GPa
NAPHTA48	5.6 GPa	5.6	GPa
NAWYES04	5600000.0 kPa	5.6	GPa
NIRJEE07	at 5.6 GPa	5.6	GPa
SUCROS36	at 5600000.0 kPa	5.6	GPa
ZOSXUA	at 5.6 GPa	5.6	GPa
ACUXAX06	at 5580000.0 kPa	5.58	GPa
ACRLAC11	5.57 GPa	5.57	GPa
VUZLOT03	5.57 GPa	5.57	GPa
TAWTAM03	at 5570000.0 kPa	5.57	GPa
ROMTUJ08	at 5561000 kPa	5.561	GPa
ADMANN17	5550000.0 kPa	5.55	GPa
GLUCSA20	5540000.0 kPa	5.54	GPa
NALCYS27	5520000.0 kPa	5.52	GPa
NONWES83	5520000.0 kPa	5.52	GPa
UNIRUF14	5520000.0 kPa	5.52	GPa
DLALNI20	at 5.5 GPa	5.5	GPa
EPANIU08	5.50 GPa	5.5	GPa
EPIVEF02	5.5 GPa	5.5	GPa
ETHANE10	5500000.0 kPa	5.5	GPa
FEROCE48	5500000.0 kPa	5.5	GPa
GAFKOO10	5500000.0 kPa	5.5	GPa
NUDPAE09	5.50 GPa	5.5	GPa
PYRZOL28	at 5500000.0 kPa	5.5	GPa
QUTQIH09	5500000.0 kPa	5.5	GPa
SUCROS35	at 5500000.0 kPa	5.5	GPa
SUCROS40	at 5500000.0 kPa	5.5	GPa
WUVSAH05	at 5500000.0 kPa	5.5	GPa
ASUQAI19	5.46 GPa	5.46	GPa
CABCUD23	5450000.0 kPa	5.45	GPa
METAMI04	5450000.0 kPa	5.45	GPa
NTROMA11	at 5.45 GPa	5.45	GPa
FAYCEP07	at 5436000 kPa	5.436	GPa
LALNIN43	at 5.43 GPa	5.43	GPa
BAMZUN04	5.4 GPa	5.4	GPa
IMEGIR09	5.4 GPa	5.4	GPa
LSERIN16	at 5.4GPa	5.4	GPa
ACUWOK11	at 5400000 kPa	5.4	GPa
NAKCIN07	5400000.0 kPa	5.4	GPa
QQQCVS12	5.39 GPa	5.39	GPa
ADMANN16	5380000.0 kPa	5.38	GPa
EPANIU07	5.38 GPa	5.38	GPa
EDUTAB08	5.35 GPa	5.35	GPa
GATLES07	at 5350000 kPa	5.35	GPa
GATLES17	at 5350000.0 kPa	5.35	GPa
JAYDUI05	5350000.0 kPa	5.35	GPa
SUCROS34	at 5350000.0 kPa	5.35	GPa
BOJKAM08	5.34 GPa	5.34	GPa
GLUCSA19	5330000.0 kPa	5.33	GPa
MACUFR07	5.32 GPa	5.32	GPa
IQOMIM19	5310000.0 kPa	5.31	GPa
ABULIT06	at 5.3 GPa	5.3	GPa
CARZIF07	at 5.30 GPa	5.3	GPa
GUMMUW04	at 5300000.0 kPa	5.3	GPa
OXACDH38	at 5300000.0 kPa	5.3	GPa
SUCROS33	at 5300000.0 kPa	5.3	GPa
SUCROS39	at 5300000.0 kPa	5.3	GPa
JEFNUG09	5.27 GPa	5.27	GPa
RAYZEZ01	5.26 GPa	5.26	GPa
SALOXM08	at 5.25 Gpa	5.25	GPa
NEDMIS06	5240000.0 kPa	5.24	GPa
NONWES56	5240000.0 kPa	5.24	GPa
GLUCSA18	5230000.0 kPa	5.23	GPa
ACEDAC20	5.2 GPa	5.2	GPa
CTMTNA02	at 5.2 GPa	5.2	GPa
ETHANE09	5200000.0 kPa	5.2	GPa
HQUACN16	5.2 GPa	5.2	GPa
IFIZIG06	at 5.2 GPa	5.2	GPa
LSERIN23	at 5.2 GPa	5.2	GPa
LSERMH16	at 5.2 GPa	5.2	GPa
QAXMEH21	5.20 GPa	5.2	GPa
SUCROS32	at 5200000.0 kPa	5.2	GPa
LSERIN36	at 5.199GPa	5.199	GPa
UJIXOC12	51.8 kbar	5.18	GPa
YOSRUU15	at 5.18 GPa	5.18	GPa
NIBSOG09	at 5.1665 GPa	5.1665	GPa
ASUQAI18	5.15 GPa	5.15	GPa
FIKKOC08	5150000.0 kPa	5.15	GPa
GLUCSA17	5150000.0 kPa	5.15	GPa
SUCROS31	at 5150000.0 kPa	5.15	GPa
DANTEN09	at 5.1 GPa	5.1	GPa
FEROCE80	5100000.0 kPa	5.1	GPa
GLYCIN44	at 5.10 GPa	5.1	GPa
NUVXAF02	5.1 GPa	5.1	GPa
PUSBEM08	5100000.0 kPa	5.1	GPa
QQQAUG16	at 5.1 GPa	5.1	GPa
SALMID06	at 5.1 GPa	5.1	GPa
SUCROS30	at 5100000.0 kPa	5.1	GPa
NEBGUX03	at 5.09 GPa	5.09	GPa
QQQCCY14	5.08 GPa	5.08	GPa
ACRLAC10	5.07 GPa	5.07	GPa
NALCYS26	5070000.0 kPa	5.07	GPa
SUCROS29	at 5050000.0 kPa	5.05	GPa
MUTKUH06	at 5.04 GPa	5.04	GPa
BAMZUN02	5.02 GPa	5.02	GPa
XELFEC26	5.02 GPa	5.02	GPa
CABCUD14	5010000.0 kPa	5.01	GPa
DLALNI19	at 5.0 GPa	5	GPa
FAPBIH06	at 5000000 kPa	5	GPa
GEHMAK02	5.0 GPa	5	GPa
LSERIN49	at 5.0 GPa	5	GPa
LUSCOR09	at 5.0 GPa	5	GPa
MEHNIY05	5.0 GPa	5	GPa
NIRJAA05	at 5.0 GPa	5	GPa
SUCROS28	at 5000000.0 kPa	5	GPa
XAMDUM04	at 5.0 GPa	5	GPa
SUCROS27	at 4950000.0 kPa	4.95	GPa
SUCROS38	at 4950000.0 kPa	4.95	GPa
NEVTIU10	4.94 GPa	4.94	GPa
FEROCE79	4930000.0 kPa	4.93	GPa
LEFJAH06	at 4.92 GPa	4.92	GPa
IZOXOL05	at 4.91GPa	4.91	GPa
CARZIF06	at 4.90 GPa	4.9	GPa
CEGFEA12	at 4.9 GPa	4.9	GPa
GLUTAM09	at 4.9 GPa	4.9	GPa
KICCOO07	at 4.9 GPa	4.9	GPa
NIRJEE06	at 4.9 GPa	4.9	GPa
METAMI03	4900000.0 kPa	4.9	GPa
NAWYES03	4900000.0 kPa	4.9	GPa
SUCROS26	at 4900000.0 kPa	4.9	GPa
ETAGIR	4.89 GPa	4.89	GPa
ACUXAX05	at 4880000.0 kPa	4.88	GPa
CITSOP07	at 4.88 GPa	4.88	GPa
ACEDAC19	4.85 GPa	4.85	GPa
NAPHTA39	4.85 GPa	4.85	GPa
SUCROS25	at 4850000.0 kPa	4.85	GPa
SUCROS37	at 4850000.0 kPa	4.85	GPa
ADMANN15	4840000.0 kPa	4.84	GPa
ACUWUQ09	4820000.0 kPa	4.82	GPa
UNIRUF13	4820000.0 kPa	4.82	GPa
FEROCE49	4810000.0 kPa	4.81	GPa
BANFII	4.8 GPa	4.8	GPa
EJIQEU01	at 4.8GPa	4.8	GPa
EKESAQ01	4.8 GPa	4.8	GPa
ETHANE08	4800000.0 kPa	4.8	GPa
LSERIN15	at 4.8GPa	4.8	GPa
NAKCEJ01	4800000.0 kPa	4.8	GPa
NAWYES02	4800000.0 kPa	4.8	GPa
PARZUG	4800000.0 kPa	4.8	GPa
QUTQIH08	4800000.0 kPa	4.8	GPa
SUCROS24	at 4800000.0 kPa	4.8	GPa
TUVXAL06	4800000.0 kPa	4.8	GPa
ASUQAI17	4.78 GPa	4.78	GPa
BOJKAM07	4.78 GPa	4.78	GPa
CTMTNA01	at 4.78GPa	4.78	GPa
YESZEE	4.77 GPa	4.77	GPa
FEROCE50	4760000.0 kPa	4.76	GPa
ROMTUJ07	at 4760000 kPa	4.76	GPa
EDUTAB07	4.75 GPa	4.75	GPa
CABCUD22	4720000.0 kPa	4.72	GPa
QQQCVS11	4.72 GPa	4.72	GPa
ACUWOK10	at 4710000 kPa	4.71	GPa
ADMANN14	4710000.0 kPa	4.71	GPa
GLYGLY18	at 4.7 GPa	4.7	GPa
LALNIN32	at 4.7 GPa	4.7	GPa
MIGPAU06	at 4.7 GPa	4.7	GPa
OHUGUU09	at 4.7 GPa	4.7	GPa
NUDPAE08	4.68 GPa	4.68	GPa
GLYCIN58	at 4.67 GPa	4.67	GPa
GLYCIN60	at 4.67 GPa	4.67	GPa
DUCKOB08	4660000.0 kPa	4.66	GPa
UNIRUF12	4660000.0 kPa	4.66	GPa
ACRLAC09	4.65 GPa	4.65	GPa
QQQCIG28	4.65 GPa	4.65	GPa
FIKKOC07	4650000.0 kPa	4.65	GPa
NONWES82	4650000.0 kPa	4.65	GPa
FOKNEY12	at 4.63GPa	4.63	GPa
CEDBUJ10	4.6 GPa	4.6	GPa
GATLES06	at 4600000 kPa	4.6	GPa
GATLES16	at 4600000.0 kPa	4.6	GPa
NIRJII06	at 4.6 GPa	4.6	GPa
SUCROS23	at 4600000.0 kPa	4.6	GPa
JEFNUG08	4.55 GPa	4.55	GPa
NUYFIX05	at 4.55 GPa	4.55	GPa
SALOXM07	at 4.55 Gpa	4.55	GPa
FEROCE37	4.54 GPa	4.54	GPa
NAOXAL05	at 4.54 GPa	4.54	GPa
RAYZEZ	4.52 GPa	4.52	GPa
LSERIN35	at 4.514GPa	4.514	GPa
FAYCEP06	at 4505000 kPa	4.505	GPa
AFUDEL06	at 4.5GPa	4.5	GPa
CYSTAC06	at 4.5 GPa	4.5	GPa
DLALNI18	at 4.5 GPa	4.5	GPa
FORMAC04	at 4.5Gpa	4.5	GPa
LSERIN22	at 4.5 GPa	4.5	GPa
LSERMH15	at 4.5 GPa	4.5	GPa
MEWXOE04	4.5000000 GPa	4.5	GPa
MIJBAK04	at 4.5 GPa	4.5	GPa
PUSBEM07	4500000.0 kPa	4.5	GPa
REQCUO04	4500000.0 kPa	4.5	GPa
JAYDUI04	4490000.0 kPa	4.49	GPa
NEVDIE	4.47 GPa	4.47	GPa
EPANIU06	4.45 GPa	4.45	GPa
FEROCE66	4430000.0 kPa	4.43	GPa
JAYDUI03	4430000.0 kPa	4.43	GPa
NALCYS25	4420000.0 kPa	4.42	GPa
NEDMIS05	4420000.0 kPa	4.42	GPa
OCOTIM	4410000.0 kPa	4.41	GPa
ABULIT05	at 4.4 GPa	4.4	GPa
DLSERN30	at 4.4 GPa	4.4	GPa
GOGJAN08	at 4.4 GPa	4.4	GPa
LILRIJ02	4.4 GPa	4.4	GPa
QQQAUG15	at 4.4 GPa	4.4	GPa
VASZAT01	4.4 GPa	4.4	GPa
BOQQUT06	at 4400000 kPa	4.4	GPa
IQOMIM18	4400000.0 kPa	4.4	GPa
PYRZOL29	at 4400000.0 kPa	4.4	GPa
QUTQIH07	4400000.0 kPa	4.4	GPa
ADMANN13	4390000.0 kPa	4.39	GPa
JOHGIX01	at 4.39 GPa	4.39	GPa
ASUQAI16	4.38 GPa	4.38	GPa
BUQGUQ02	at 4.38 GPa	4.38	GPa
CLMETH04	4380000.0 kPa	4.38	GPa
GLYCIN45	at 4.38 GPa	4.38	GPa
DADTOS17	4.37 GPa	4.37	GPa
QQQCCY13	4.36 GPa	4.36	GPa
XELFEC25	4.36 GPa	4.36	GPa
BCBANN03	4350000.0 kPa	4.35	GPa
BCBANN14	4350000.0 kPa	4.35	GPa
NONWES90	4350000.0 kPa	4.35	GPa
LALNIN42	at 4.31 GPa	4.31	GPa
EKESEU	4.3 GPa	4.3	GPa
GLYCIN68	at 4.3 GPa	4.3	GPa
IMEGIR08	4.3 GPa	4.3	GPa
MEHNIY04	4.3 GPa	4.3	GPa
OHUGUU08	at 4.3 GPa	4.3	GPa
TIQDUT07	4300000.0 kPa	4.3	GPa
WEYQAU16	4.3 GPa	4.3	GPa
ACEDAC18	4.29 GPa	4.29	GPa
NEVDEA	4.28 GPa	4.28	GPa
DOLBIR14	4.275 GPa	4.275	GPa
LSERIN34	at 4.270GPa	4.27	GPa
ACUWUQ08	4250000.0 kPa	4.25	GPa
EKESAQ	4.25 GPa	4.25	GPa
GATLES05	at 4250000 kPa	4.25	GPa
GATLES15	at 4250000.0 kPa	4.25	GPa
OHAYEC	at 4.23 GPa	4.23	GPa
QQQCVS10	4.23 GPa	4.23	GPa
DANTEN08	at 4.2 GPa	4.2	GPa
GLUCSA24	4200000.0 kPa	4.2	GPa
LCYSTN25	at 4.2 GPa	4.2	GPa
LSERIN26	at 4.2 GPa	4.2	GPa
MEWXOE03	4.2000000 GPa	4.2	GPa
NAOXAL07	at 4.20 GPa	4.2	GPa
NIRJEE05	at 4.2 GPa	4.2	GPa
ACUWOK09	at 4190000 kPa	4.19	GPa
SOGFOL04	at 4190000 kPa	4.19	GPa
ACRLAC08	4.18 GPa	4.18	GPa
FIKKOC06	4180000.0 kPa	4.18	GPa
GLYCIN38	at 4.17 GPa	4.17	GPa
GLYCIN57	at 4.17 GPa	4.17	GPa
FAWFOY12	4.15 GPa	4.15	GPa
ETHANE07	4150000.0 kPa	4.15	GPa
FEROCE65	4140000.0 kPa	4.14	GPa
FEROCE51	4130000.0 kPa	4.13	GPa
ASUQAI15	4.11 GPa	4.11	GPa
DLALNI17	at 4.1 GPa	4.1	GPa
GAFKOO09	4100000.0 kPa	4.1	GPa
LSERIN14	at 4.1GPa	4.1	GPa
METAMI02	4100000.0 kPa	4.1	GPa
NAKCIN06	4100000.0 kPa	4.1	GPa
NAOXAL04	at 4.10 GPa	4.1	GPa
SAZZID18	at 4.10 GPa	4.1	GPa
WEMWEQ06	4100000.0 kPa	4.1	GPa
BOJKAM06	4.08 GPa	4.08	GPa
EPANIU05	4.08 GPa	4.08	GPa
FUVGAG02	4.06 GPa	4.06	GPa
ROMTUJ06	at 4060000 kPa	4.06	GPa
GIGGEL	4.04 GPa	4.04	GPa
MACUFR06	4.04 GPa	4.04	GPa
BIHXIC12	4.035 GPa	4.035	GPa
CABCUD13	4030000.0 kPa	4.03	GPa
CABCUD21	4030000.0 kPa	4.03	GPa
QAXMEH20	4.03 GPa	4.03	GPa
UNIRUF11	4030000.0 kPa	4.03	GPa
HEXCET15	4.02 GPa	4.02	GPa
SIMDEA05	4020000.0 kPa	4.02	GPa
TAWTAM02	at 4020000.0 kPa	4.02	GPa
FAPBIH05	at 4010000 kPa	4.01	GPa
IFEPUG10	4.01 GPa	4.01	GPa
ADMANN12	4000000.0 kPa	4	GPa
BAMZUN03	4.0 GPa	4	GPa
BISMEV10	at 4.0 GPa	4	GPa
GLUCSA23	4000000.0 kPa	4	GPa
HQUACN11	4.0 GPa	4	GPa
HXACAN12	at 4.0 GPa	4	GPa
IBPRAC15	4 GPa	4	GPa
IFIZIG05	at 4.0 GPa	4	GPa
KICCOO06	at 4.0 GPa	4	GPa
LSERIN48	at 4.0 GPa	4	GPa
MENTIJ03	at 4.0 GPa	4	GPa
NAWYES01	4000000.0 kPa	4	GPa
NTROMA09	at 4.0 GPa	4	GPa
OHUGUU07	at 4.0 GPa	4	GPa
QQQAUG14	at 4.0 GPa	4	GPa
REQCUO03	4000000.0 kPa	4	GPa
SALMID05	at 4.0 GPa	4	GPa
GIGGAH	3.99 GPa	3.99	GPa
IQOMIM17	3980000.0 kPa	3.98	GPa
CITSOP06	at 3.96 GPa	3.96	GPa
FEROCE52	3960000.0 kPa	3.96	GPa
JAYDUI02	3960000.0 kPa	3.96	GPa
XELFEC24	3.96 GPa	3.96	GPa
QEYZAY	3.9500000 GPa	3.95	GPa
VUZLOT07	3.95 GPa	3.95	GPa
WABVIF03	at 3.95 GPa	3.95	GPa
IZOXOL04	at 3.94GPa	3.94	GPa
JOHGIX02	at 3.94 GPa	3.94	GPa
NUDPAE07	3.94 GPa	3.94	GPa
YESZAA	3.93 GPa	3.93	GPa
NEVTIU01	3.92 GPa	3.92	GPa
UJIXOC11	39.1 kbar	3.91	GPa
YOSRUU14	at 3.91 GPa	3.91	GPa
LALNIN31	at 3.9 GPa	3.9	GPa
PUSBEM06	3900000.0 kPa	3.9	GPa
XAMDUM05	at 3.9 GPa	3.9	GPa
UTIXAX04	3.891 GPa	3.891	GPa
AFUDEL05	at 3.89 GPa	3.89	GPa
ASUQAI14	3.88 GPa	3.88	GPa
NIBSOG08	at 3.856 GPa	3.856	GPa
MAGVOG15	at 3.85 GPa	3.85	GPa
NEDMIS04	3840000.0 kPa	3.84	GPa
NEVLAE	3.84 GPa	3.84	GPa
MAPBTI21	3830000.0 kPa	3.83	GPa
FIKKOC05	3820000.0 kPa	3.82	GPa
FUVGAG01	3.82 GPa	3.82	GPa
ACUXAX04	at 3800000.0 kPa	3.8	GPa
BENZEN21	3.8 GPa	3.8	GPa
CEGFEA11	at 3.8 GPa	3.8	GPa
CIJNAN01	3.8 GPa	3.8	GPa
EDUTAB06	3.80 GPa	3.8	GPa
GUMMUW05	at 3800000.0 kPa	3.8	GPa
LSERMH14	at 3.8 GPa	3.8	GPa
MUTKUH05	at 3.80 GPa	3.8	GPa
NAKCEJ06	3800000.0 kPa	3.8	GPa
PARZUG01	3800000.0 kPa	3.8	GPa
QQQCCY12	3.8 GPa	3.8	GPa
QUTQIH06	3800000.0 kPa	3.8	GPa
ACEDAC17	3.79 GPa	3.79	GPa
ACUWOK08	at 3780000 kPa	3.78	GPa
JEFNUG07	3.78 GPa	3.78	GPa
ACRLAC07	3.77 GPa	3.77	GPa
ETHANE06	3750000.0 kPa	3.75	GPa
NEBGUX02	at 3.74 GPa	3.74	GPa
XELFEC23	3.74 GPa	3.74	GPa
LUSCOR08	at 3.73 GPa	3.73	GPa
SEHHIX18	at 3.73 GPa	3.73	GPa
NEVKUX	3.72 GPa	3.72	GPa
CARZIF05	at 3.70 GPa	3.7	GPa
DLSERN29	at 3.7 GPa	3.7	GPa
GLUTAS05	at 3.70 GPa	3.7	GPa
GLYGLY17	at 3.7 GPa	3.7	GPa
LCYSTI19	at 3.7GPa	3.7	GPa
LSERMH13	at 3.7 GPa	3.7	GPa
NAPHTA40	3.7 GPa	3.7	GPa
NUVXAF01	3.7 GPa	3.7	GPa
JAYDUI01	3690000.0 kPa	3.69	GPa
YIHHON11	3680000.0 kPa	3.68	GPa
TAWTAM05	at 3670000.0 kPa	3.67	GPa
ASUQAI13	3.66 GPa	3.66	GPa
FEROCE53	3650000.0 kPa	3.65	GPa
METAMI01	3650000.0 kPa	3.65	GPa
FAWFOY11	3.64 GPa	3.64	GPa
PEXNIQ07	3.64 GPa	3.64	GPa
GLYCIN46	at 3.63 GPa	3.63	GPa
IZALIG	3.63 GPa	3.63	GPa
QQQCVS09	3.63 GPa	3.63	GPa
BANBOK	3.6 GPa	3.6	GPa
BENZEN23	3.6 GPa	3.6	GPa
DLALNI16	at 3.6 GPa	3.6	GPa
EKESIY08	3.6 GPa	3.6	GPa
GLUTAM08	at 3.6 GPa	3.6	GPa
IMEGIR07	3.6 GPa	3.6	GPa
MIJBAK03	at 3.6 GPa	3.6	GPa
SAZZID17	at 3.60 GPa	3.6	GPa
XELFEC22	3.60 GPa	3.6	GPa
ESUVAR02	3600000.0 kPa	3.6	GPa
GATLES04	at 3600000 kPa	3.6	GPa
GATLES14	at 3600000.0 kPa	3.6	GPa
OXACDH37	at 3600000.0 kPa	3.6	GPa
SOGFOL03	at 3600000 kPa	3.6	GPa
SUCROS22	at 3600000.0 kPa	3.6	GPa
EDELUX29	3.59 GPa	3.59	GPa
NEVSUF11	3.59 GPa	3.59	GPa
FUVGAG	3.58 GPa	3.58	GPa
QQQCIG27	3.58 GPa	3.58	GPa
FAYCEP05	at 3570000 kPa	3.57	GPa
IQOMIM16	3570000.0 kPa	3.57	GPa
MAGVOG14	at 3.57 GPa	3.57	GPa
TUVXAL05	3560000.0 kPa	3.56	GPa
NEVSUF10	3.55 GPa	3.55	GPa
ISIYUF04	3.524 GPa	3.524	GPa
FEROCE64	3510000.0 kPa	3.51	GPa
NALCYS24	3510000.0 kPa	3.51	GPa
GOGJAN07	at 3.5 GPa	3.5	GPa
LALNIN30	at 3.5 GPa	3.5	GPa
MEWZIA	3.5000000 GPa	3.5	GPa
NAOXAL08	at 3.50 GPa	3.5	GPa
NIRJEE04	at 3.5 GPa	3.5	GPa
NTROMA07	at 3.5 GPa	3.5	GPa
NTROMA08	at 3.5 GPa	3.5	GPa
OHUGUU06	at 3.5 GPa	3.5	GPa
QQQAUG13	at 3.5 GPa	3.5	GPa
VOFVAN25	at 3.5 GPa	3.5	GPa
VUHTOI02	at 3.50 GPa	3.5	GPa
LEFJAH05	at 3.49 GPa	3.49	GPa
ETAGEN	3.48 GPa	3.48	GPa
HUCQED05	3.4700000 GPa	3.47	GPa
IBPRAC14	3.46 GPa	3.46	GPa
SALOXM06	at 3.46 Gpa	3.46	GPa
LSERIN33	at 3.458GPa	3.458	GPa
DUCKOB07	3440000.0 kPa	3.44	GPa
FOKNEY11	at 3.43 GPa	3.43	GPa
IFEPUG01	3.43 GPa	3.43	GPa
UNIRUF10	3430000.0 kPa	3.43	GPa
ADMANN11	3420000.0 kPa	3.42	GPa
XELFEC21	3.42 GPa	3.42	GPa
CEDBUJ09	3.4 GPa	3.4	GPa
MIGPAU05	at 3.4 GPa	3.4	GPa
MUTKUH04	at 3.40 GPa	3.4	GPa
NEVSUF09	3.40 GPa	3.4	GPa
NIRJAA04	at 3.4 GPa	3.4	GPa
NIRJII05	at 3.4 GPa	3.4	GPa
ROMTUJ05	at 3400000 kPa	3.4	GPa
EPANIU04	3.38 GPa	3.38	GPa
GLYCIN37	at 3.38 GPa	3.38	GPa
GLYCIN56	at 3.38 GPa	3.38	GPa
MAGVOG13	at 3.38 GPa	3.38	GPa
COXZAS06	3.37 GPa	3.37	GPa
DADTOS16	3.36 GPa	3.36	GPa
MAPBTI16	3360000.0 kPa	3.36	GPa
IMAZOL33	at 3.35 GPa	3.35	GPa
CEKGUU06	3350000.0 kPa	3.35	GPa
ETHANE05	3350000.0 kPa	3.35	GPa
YIHHON10	3350000.0 kPa	3.35	GPa
DADVAG08	3340000.0 kPa	3.34	GPa
NAOXAL13	at 3.34 GPa	3.34	GPa
ACRLAC06	3.33 GPa	3.33	GPa
ASUQAI12	3.33 GPa	3.33	GPa
BEDMIG18	at 3.33 GPa	3.33	GPa
UTIXAX22	3.325 GPa	3.325	GPa
CABCUD20	3320000.0 kPa	3.32	GPa
HEMTID09	3.31 GPa	3.31	GPa
CEGFEA10	at 3.3 GPa	3.3	GPa
DANTEN07	at 3.3 GPa	3.3	GPa
HAZGUM	at 3.3 GPa	3.3	GPa
JAYDUI07	3300000.0 kPa	3.3	GPa
JEFNUG06	3.30 GPa	3.3	GPa
LIQLIH15	at 3300000.0 kPa	3.3	GPa
NEVTIU08	3.3 GPa	3.3	GPa
PUBMUU23	at 3.30(5) GPa	3.3	GPa
QQQCCY11	3.3 GPa	3.3	GPa
QUTQIH05	3300000.0 kPa	3.3	GPa
REQCIC05	3300000.0 kPa	3.3	GPa
YAWYED02	3.3 GPa	3.3	GPa
SIMDEA04	3280000.0 kPa	3.28	GPa
ACUWOK07	at 3270000 kPa	3.27	GPa
ACUWUQ07	3270000.0 kPa	3.27	GPa
GLYCIN51	at 3.27 GPa	3.27	GPa
GLYCIN55	at 3.27 GPa	3.27	GPa
NAOXAL15	at 3.26 GPa	3.26	GPa
NIFREC	3250000.0 kPa	3.25	GPa
NIFSON	3250000.0 kPa	3.25	GPa
FEROCE77	3240000.0 kPa	3.24	GPa
QQQCVS08	3.23 GPa	3.23	GPa
NONWES81	3220000.0 kPa	3.22	GPa
GLUCSA16	3210000.0 kPa	3.21	GPa
LALNIN41	at 3.21 GPa	3.21	GPa
QEYZAY06	3.2100000 GPa	3.21	GPa
WABVIF02	at 3.21 GPa	3.21	GPa
CIJMUG01	3.2 GPa	3.2	GPa
HQUACN10	3.2 GPa	3.2	GPa
LUSCOR07	at 3.20 GPa	3.2	GPa
WEYQAU15	3.2 GPa	3.2	GPa
DEHHEF03	3200000.0 kPa	3.2	GPa
GAFKOO08	3200000.0 kPa	3.2	GPa
PARZUG02	3200000.0 kPa	3.2	GPa
PUSCIR	3200000.0 kPa	3.2	GPa
RIBKES12	at 3200000.0 kPa	3.2	GPa
WEMWEQ05	3200000.0 kPa	3.2	GPa
HEXCET14	3.19 GPa	3.19	GPa
FUVFUZ	3.18 GPa	3.18	GPa
MAGVOG12	at 3.18 GPa	3.18	GPa
ACEDAC16	3.17 GPa	3.17	GPa
NEVSUF02	3.17 GPa	3.17	GPa
XELFEC09	3.17 GPa	3.17	GPa
EDELUX28	3.15 GPa	3.15	GPa
GUMMUW06	at 3150000.0 kPa	3.15	GPa
BNPHTA10	3.14 GPa	3.14	GPa
PTMGLO05	at 3.14 GPa	3.14	GPa
YOSRUU13	at 3.14 GPa	3.14	GPa
DADVAG07	3140000.0 kPa	3.14	GPa
IQOMIM15	3130000.0 kPa	3.13	GPa
NUDPAE06	3.13 GPa	3.13	GPa
GLYCIN47	at 3.12 GPa	3.12	GPa
MACUFR14	3.11 GPa	3.11	GPa
BENZEN10	at 3.1 GPa	3.1	GPa
COXZAS05	3.10 GPa	3.1	GPa
DLSERN28	at 3.1 GPa	3.1	GPa
IMEGIR06	3.1 GPa	3.1	GPa
LSERIN47	at 3.1 GPa	3.1	GPa
MENTIJ02	at 3.10 GPa	3.1	GPa
NAPHTA41	3.1 GPa	3.1	GPa
UREAXX26	3.10(5) GPa	3.1	GPa
NONWES89	3090000.0 kPa	3.09	GPa
VOLNOA09	3.081 GPa	3.081	GPa
FIKKOC04	3080000.0 kPa	3.08	GPa
IZOXOL03	at 3.08GPa	3.08	GPa
JOHGIX03	at 3.07 GPa	3.07	GPa
NONWES55	3070000.0 kPa	3.07	GPa
PEXNIQ06	3.06 GPa	3.06	GPa
FEROCE63	3050000.0 kPa	3.05	GPa
FAPBIH04	at 3040000 kPa	3.04	GPa
XAXCOQ01	at 3040000.0 kPa	3.04	GPa
XELFEC20	3.04 GPa	3.04	GPa
CITSOP05	at 3.02 GPa	3.02	GPa
HQUACN09	3.02 GPa	3.02	GPa
UJIXOC10	30.1 kbar	3.01	GPa
ACRLAC05	3 GPa	3	GPa
ADMANN10	3000000.0 kPa	3	GPa
BOQQUT05	at 3000000 kPa	3	GPa
CABCUD12	3000000.0 kPa	3	GPa
DLALNI15	at 3.0 GPa	3	GPa
ETANOL01	at 3.0 GPa	3	GPa
GLYGLY16	at 3.0 GPa	3	GPa
HXACAN11	at 3.0 GPa	3	GPa
IMAZOL32	at 3.00 GPa	3	GPa
KIWXIZ03	3000000.0 kPa	3	GPa
NAKCEJ05	3000000.0 kPa	3	GPa
NUYFIX04	at 3.00 GPa	3	GPa
OSAVAH17	3.0 GPa	3	GPa
SOGFOL02	at 3000000 kPa	3	GPa
XAMDUM03	at 3.0 GPa	3	GPa
SIMDAW03	2980000.0 kPa	2.98	GPa
BINAPH24	2.97 GPa	2.97	GPa
NEVTIU09	2.97 GPa	2.97	GPa
TUVXAL04	2960000.0 kPa	2.96	GPa
UREAXX38	2.96 GPa	2.96	GPa
WUVSAH04	at 2960000.0 kPa	2.96	GPa
OHAYAY	at 2.95 GPa	2.95	GPa
UNIRUF09	2950000.0 kPa	2.95	GPa
GLUTAS04	at 2.94 GPa	2.94	GPa
YESXIG	2.94 GPa	2.94	GPa
MAGVOG11	at 2.93 GPa	2.93	GPa
ASUQAI11	2.92 GPa	2.92	GPa
NEVSUF08	2.92 GPa	2.92	GPa
NEVTIU05	2.92 GPa	2.92	GPa
SEHHIX17	at 2.92 GPa	2.92	GPa
BEDMIG17	at 2.91 GPa	2.91	GPa
XELFEC19	2.91 GPa	2.91	GPa
CLMETH03	2910000.0 kPa	2.91	GPa
AFUDEL04	at 2.9 GPa	2.9	GPa
BAMZUN01	2.9 GPa	2.9	GPa
BZDMAZ05	2.90(2) GPa	2.9	GPa
BZDMAZ28	2.90(2) GPa	2.9	GPa
FEROCE76	2900000.0 kPa	2.9	GPa
KICCOO05	at 2.9 GPa	2.9	GPa
LALNIN29	at 2.9 GPa	2.9	GPa
LSERIN13	at 2.9GPa	2.9	GPa
MEHNIY03	2.9 GPa	2.9	GPa
NAGHOT	at 2.9 GPa	2.9	GPa
NAWYES	2900000.0 kPa	2.9	GPa
YIHHON09	2900000.0 kPa	2.9	GPa
ACUWOK06	at 2880000 kPa	2.88	GPa
HEMTID17	2.88 GPa	2.88	GPa
NALCYS23	2880000.0 kPa	2.88	GPa
TAWTAM01	at 2880000.0 kPa	2.88	GPa
UJUKAM11	2.88 GPa	2.88	GPa
IFEPUG09	2.87 GPa	2.87	GPa
FEROCE54	2860000.0 kPa	2.86	GPa
KANZEE11	2.85 GPa	2.85	GPa
LIQLIH14	at 2.85 GPa	2.85	GPa
MBRMET15	2850000.0 kPa	2.85	GPa
NEVSUF07	2.85 GPa	2.85	GPa
OKEZAH06	2850000.0 kPa	2.85	GPa
UTIXAX21	2.841 GPa	2.841	GPa
COXZAS04	2.84 GPa	2.84	GPa
QAXMEH18	2.84 GPa	2.84	GPa
BECRUX04	2.81 GPa	2.81	GPa
BOJKAM05	2.81 GPa	2.81	GPa
NIBSOG07	at 2.8075 GPa	2.8075	GPa
CYSTAC05	at 2.8 GPa	2.8	GPa
EPZBNI06	2800000.0 kPa	2.8	GPa
FUQLIM09	2.8 GPa	2.8	GPa
IPIXUB10	2800000.0 kPa	2.8	GPa
IPIXUB15	2800000.0 kPa	2.8	GPa
JEFNUG05	2.8 GPa	2.8	GPa
OHUGUU05	at 2.8 GPa	2.8	GPa
PUSBEM05	2800000.0 kPa	2.8	GPa
SUCROS21	at 2800000.0 kPa	2.8	GPa
XELFEC08	2.79 GPa	2.79	GPa
IZALEC	2.78 GPa	2.78	GPa
XELFEC18	2.78 GPa	2.78	GPa
BIHXIC11	2.77 GPa	2.77	GPa
FUVDEH08	2.76 GPa	2.76	GPa
NEBGUX05	at 2.76 GPa	2.76	GPa
NEVSUF06	2.76 GPa	2.76	GPa
FEROCE75	2750000.0 kPa	2.75	GPa
KECYBU08	at 2.75 GPa	2.75	GPa
UREAXX37	2.75 GPa	2.75	GPa
GLYCIN54	at 2.74 GPa	2.74	GPa
DADVAG06	2730000.0 kPa	2.73	GPa
CABCUD11	2720000.0 kPa	2.72	GPa
EDELUX27	2.71 GPa	2.71	GPa
HUCQED04	2.7100000 GPa	2.71	GPa
MAPBTI19	2710000.0 kPa	2.71	GPa
UJUJUF03	2.71 GPa	2.71	GPa
ABULIT04	at 2.7 GPa	2.7	GPa
FOHCEK	at 2.7 GPa	2.7	GPa
FOHCEK01	at 2.7 GPa	2.7	GPa
FOHCEK02	at 2.7 GPa	2.7	GPa
FOHCEK03	at 2.7 GPa	2.7	GPa
GLUTAM07	at 2.7 GPa	2.7	GPa
GOGJAN06	at 2.7 GPa	2.7	GPa
HEMTID08	2.70 GPa	2.7	GPa
IMAZOL21	at 2.7 GPa	2.7	GPa
QOVXEG01	2.7 GPa	2.7	GPa
QQQCCY10	2.7 GPa	2.7	GPa
ETHANE04	2700000.0 kPa	2.7	GPa
NAKCIN05	2700000.0 kPa	2.7	GPa
OSAVAH13	2.66 GPa	2.66	GPa
HQUACN08	2.65 GPa	2.65	GPa
IBPRAC13	2.65 GPa	2.65	GPa
LUSCOR06	at 2.65 GPa	2.65	GPa
NAOXAL12	at 2.65 GPa	2.65	GPa
NAPHTA42	2.65 GPa	2.65	GPa
BEDMIG16	at 2.63 GPa	2.63	GPa
NEVSUF03	2.63 GPa	2.63	GPa
XELFEC17	2.63 GPa	2.63	GPa
LSERIN32	at 2.625GPa	2.625	GPa
COXZAS03	2.62 GPa	2.62	GPa
NAOXAL14	at 2.62 GPa	2.62	GPa
FEROCE74	2620000.0 kPa	2.62	GPa
XAXCOQ	at 2620000.0 kPa	2.62	GPa
ABUMOZ09	2.60 GPa	2.6	GPa
CEDBUJ08	2.6 GPa	2.6	GPa
DUCKOB06	2600000.0 kPa	2.6	GPa
EPIVEF01	2.6 GPa	2.6	GPa
FEGHAA11	2.6 GPa	2.6	GPa
GLUCSA15	2600000.0 kPa	2.6	GPa
GLYCIN79	at 2.6 GPa	2.6	GPa
LCYSTN24	at 2.6 GPa	2.6	GPa
LSERMH12	at 2.6 GPa	2.6	GPa
PYRZOL30	at 2600000.0 kPa	2.6	GPa
QUTQIH04	2600000.0 kPa	2.6	GPa
SAZZID16	at 2.60 GPa	2.6	GPa
TIQDUT05	2600000.0 kPa	2.6	GPa
UJUKAM10	2.60 GPa	2.6	GPa
ACRLAC22	2.59 GPa	2.59	GPa
VUZLOT02	2.59 GPa	2.59	GPa
DADTOS15	2.56 GPa	2.56	GPa
CEKGUU05	2550000.0 kPa	2.55	GPa
EPANIU03	2.55 GPa	2.55	GPa
GUMMUW07	at 2550000.0 kPa	2.55	GPa
NUXJUM04	at 2550000.0 kPa	2.55	GPa
EDUTAB05	2.53 GPa	2.53	GPa
EMIMOE	2530000.0 kPa	2.53	GPa
MIMETH14	at 2.53GPa	2.53	GPa
RIBKES13	at 2530000.0 kPa	2.53	GPa
COXZAS47	2.52 GPa	2.52	GPa
FAWFOY10	2.52 GPa	2.52	GPa
QQQCVS07	2.52 GPa	2.52	GPa
ACEDAC15	2.51 GPa	2.51	GPa
HEMTID16	2.51 GPa	2.51	GPa
MAPBTI15	2510000.0 kPa	2.51	GPa
PUWWIO	2.51E-05 GPa	2.51	GPa
YOCZOG15	2.51 GPa	2.51	GPa
YOCZOG16	2.51 GPa	2.51	GPa
FAYCEP04	at 2509000 kPa	2.509	GPa
BEDMIG15	at 2.50 GPa	2.5	GPa
BISMEV09	at 2.5 GPa	2.5	GPa
CABCUD19	2500000.0 kPa	2.5	GPa
DLALNI14	at 2.5 GPa	2.5	GPa
DLSERN27	at 2.5 GPa	2.5	GPa
DUCKOB05	2500000.0 kPa	2.5	GPa
FAPBIH03	at 2500000 kPa	2.5	GPa
GAFKOO07	2500000.0 kPa	2.5	GPa
GEHMAK01	2.5 GPa	2.5	GPa
IFIZIG04	at 2.5 GPa	2.5	GPa
IMAZOL31	at 2.50 GPa	2.5	GPa
LIQLIH13	at 2.5 GPa	2.5	GPa
NURKUH	at 2.5 GPa	2.5	GPa
OHUGOO	at 2.5 GPa	2.5	GPa
REQCUO02	2500000.0 kPa	2.5	GPa
UREAXX36	2.50 GPa	2.5	GPa
WEYQAU14	2.5 GPa	2.5	GPa
ADMANN09	2490000.0 kPa	2.49	GPa
POWSID04	2.48 GPa	2.48	GPa
QEYZAY04	2.4800000 GPa	2.48	GPa
YIHHON08	2480000.0 kPa	2.48	GPa
IQOMIM14	2460000.0 kPa	2.46	GPa
XELFEC16	2.45 GPa	2.45	GPa
YARZUN03	at 2.45 GPa	2.45	GPa
DADTUY11	2450000.0 kPa	2.45	GPa
FEROCE62	2450000.0 kPa	2.45	GPa
UTIXAX20	2.438 GPa	2.438	GPa
FEROCE55	2420000.0 kPa	2.42	GPa
JOHGIX04	at 2.42 GPa	2.42	GPa
QQQCIG26	2.42 GPa	2.42	GPa
UJUJUF02	2.42 GPa	2.42	GPa
CEKGUU04	2400000.0 kPa	2.4	GPa
DMETSO06	at 2.4 GPa	2.4	GPa
EKESIY07	2.4 GPa	2.4	GPa
FUVDEH07	2.40 GPa	2.4	GPa
IMEGIR05	2.4 GPa	2.4	GPa
MACUFR13	2.40 GPa	2.4	GPa
NIRJAA03	at 2.4 GPa	2.4	GPa
SUVGIA	at 2.40 GPa	2.4	GPa
SUVGIA03	at 2.4 GPa	2.4	GPa
WIZMAV10	2400000.0 kPa	2.4	GPa
PTMGLO04	at 2.39 GPa	2.39	GPa
PTMGLO06	at 2.39 GPa	2.39	GPa
PYRAZI04	2.39 GPa	2.39	GPa
ACUXAX03	at 2380000.0 kPa	2.38	GPa
ONUTOI03	2.38 GPa	2.38	GPa
BNPHTA09	2.37 GPa	2.37	GPa
JEFNUG04	2.37 GPa	2.37	GPa
SALOXM05	at 2.37 Gpa	2.37	GPa
GLYCIN48	at 2.36 GPa	2.36	GPa
UJUKAM09	2.36 GPa	2.36	GPa
GATLES03	at 2350000 kPa	2.35	GPa
GATLES13	at 2350000.0 kPa	2.35	GPa
OKEZAH05	2350000.0 kPa	2.35	GPa
SUCROS20	at 2350000.0 kPa	2.35	GPa
YOSRUU12	at 2.35 GPa	2.35	GPa
FUQLIM08	2.34 GPa	2.34	GPa
MAPBTI14	2340000.0 kPa	2.34	GPa
LENBOV03	at 2330000 kPa	2.33	GPa
ZEFPUX01	at 2.33 GPa	2.33	GPa
ASUQAI10	2.32 GPa	2.32	GPa
EDELUX26	2.32 GPa	2.32	GPa
FIKKOC03	2320000.0 kPa	2.32	GPa
IBPRAC12	2.32 GPa	2.32	GPa
NEVTIU07	2.32 GPa	2.32	GPa
XELFEC15	2.32 GPa	2.32	GPa
AKEZIB05	2.31 GPa	2.31	GPa
KOWYEA14	at 2310000.0 kPa	2.31	GPa
ABUMOZ08	2.30 GPa	2.3	GPa
DEHHEF06	2300000.0 kPa	2.3	GPa
FEGHAA10	2.3 GPa	2.3	GPa
GLYCIN78	at 2.3 GPa	2.3	GPa
IFEPUG08	2.30 GPa	2.3	GPa
LALNIN40	at 2.30 GPa	2.3	GPa
LCYSTI18	at 2.3GPa	2.3	GPa
MUTKUH03	at 2.30 GPa	2.3	GPa
NIRJII04	at 2.3 GPa	2.3	GPa
REQCIC04	2300000.0 kPa	2.3	GPa
ROMTUJ04	at 2300000 kPa	2.3	GPa
XEFPEF02	2.3 GPa	2.3	GPa
UNIRUF08	2290000.0 kPa	2.29	GPa
BZDMAZ06	2.27(2) GPa	2.27	GPa
BZDMAZ27	2.27(2) GPa	2.27	GPa
MAGVOG10	at 2.27 GPa	2.27	GPa
HEMTID15	2.26 GPa	2.26	GPa
NEVSUF01	2.26 GPa	2.26	GPa
YOCZOG14	2.26 GPa	2.26	GPa
DADVAG05	2250000.0 kPa	2.25	GPa
OHUGUU04	at 2.25 GPa	2.25	GPa
PYRZOL31	at 2250000.0 kPa	2.25	GPa
BZDMAZ08	2.24(2) GPa	2.24	GPa
BZDMAZ25	2.24(2) GPa	2.24	GPa
IMAZOL20	at 2.24 GPa	2.24	GPa
BZDMAZ07	2.23(2) GPa	2.23	GPa
BZDMAZ26	2.23(2) GPa	2.23	GPa
BINAPH23	2.21 GPa	2.21	GPa
CARZIF04	at 2.20 GPa	2.2	GPa
CEGFEA09	at 2.2 GPa	2.2	GPa
DANTEN06	at 2.2 GPa	2.2	GPa
IPIXUB07	2.2 GPa	2.2	GPa
IZOXOL02	at 2.20GPa	2.2	GPa
LALNIN28	at 2.2 GPa	2.2	GPa
LIQLIH12	at 2.2 GPa	2.2	GPa
MIGPAU04	at 2.2 GPa	2.2	GPa
NIRJEE03	at 2.2 GPa	2.2	GPa
PIGQUS03	at 2.2 GPa	2.2	GPa
SEHHIX16	at 2.20 GPa	2.2	GPa
UREAXX35	2.20 GPa	2.2	GPa
XAMDUM02	at 2.2 GPa	2.2	GPa
ESUTAP	2200000.0 kPa	2.2	GPa
NEDMIS03	2200000.0 kPa	2.2	GPa
PASBIX	2200000.0 kPa	2.2	GPa
WEMWEQ04	2200000.0 kPa	2.2	GPa
AKEZIB04	2.19 GPa	2.19	GPa
IZALAY	2.19 GPa	2.19	GPa
HEMTID18	2.18 GPa	2.18	GPa
ACUWOK05	at 2180000 kPa	2.18	GPa
NIBSOG06	at 2.1775 GPa	2.1775	GPa
ABUMOZ07	2.17 GPa	2.17	GPa
AKEYOG03	2.17 GPa	2.17	GPa
HUCQED03	2.1700000 GPa	2.17	GPa
RIBKES11	at 2170000.0 kPa	2.17	GPa
AFUDEL07	at 2.16GPa	2.16	GPa
YESZII	2.16 GPa	2.16	GPa
YOMXUT07	2.16 GPa	2.16	GPa
ADMANN08	2160000.0 kPa	2.16	GPa
MAPBTI13	2160000.0 kPa	2.16	GPa
HQUACN07	2.15 GPa	2.15	GPa
IODOFO04	at 2.15 GPa	2.15	GPa
IPIXUB12	2150000.0 kPa	2.15	GPa
MECHLF15	at 2.15 GPa	2.15	GPa
IZAKEB	2.14 GPa	2.14	GPa
ZEFPUX	at 2.14 GPa	2.14	GPa
CABCUD10	2130000.0 kPa	2.13	GPa
BOJKAM04	2.12 GPa	2.12	GPa
FEROCE73	2120000.0 kPa	2.12	GPa
FUQLIM07	2.12 GPa	2.12	GPa
NALCYS22	2120000.0 kPa	2.12	GPa
NUDPAE05	2.12 GPa	2.12	GPa
UJUKAM08	2.12 GPa	2.12	GPa
YESYED	2.11 GPa	2.11	GPa
ACRLAC21	2.10 GPa	2.1	GPa
BEDMIG14	at 2.10 GPa	2.1	GPa
EPZBNI05	2100000.0 kPa	2.1	GPa
KIWXIZ02	2100000.0 kPa	2.1	GPa
LSERIN46	at 2.1 GPa	2.1	GPa
NAPHTA22	at 2.1 GPa	2.1	GPa
OKEZAH04	2100000.0 kPa	2.1	GPa
QQQAUG12	at 2.1 GPa	2.1	GPa
QQQCCY09	2.1 GPa	2.1	GPa
TOLUEN10	2100000.0 kPa	2.1	GPa
URELIO06	2100000.0 kPa	2.1	GPa
URELIO07	2100000.0 kPa	2.1	GPa
URELIO08	2100000.0 kPa	2.1	GPa
URELIO09	2100000.0 kPa	2.1	GPa
URELIO10	2100000.0 kPa	2.1	GPa
URELIO11	2100000.0 kPa	2.1	GPa
URELIO12	2100000.0 kPa	2.1	GPa
YIHHON07	2100000.0 kPa	2.1	GPa
YOCZOG13	2.10 GPa	2.1	GPa
EPANIU02	2.09 GPa	2.09	GPa
NEVSUF	2.09 GPa	2.09	GPa
SIMDEA03	2090000.0 kPa	2.09	GPa
XELFEC07	2.09 GPa	2.09	GPa
VOLNOA08	2.080 GPa	2.08	GPa
FEROCE56	2050000.0 kPa	2.05	GPa
CITSOP04	at 2.04 GPa	2.04	GPa
COXZAS20	2.04 GPa	2.04	GPa
PIWXEY06	at 2.04 GPa	2.04	GPa
EDELUX25	2.03 GPa	2.03	GPa
UTIXAX19	2.026 GPa	2.026	GPa
OKEZAH03	2020000.0 kPa	2.02	GPa
BIHXIC10	2.01 GPa	2.01	GPa
UNIRUF07	2010000.0 kPa	2.01	GPa
DLALNI13	at 2.0 GPa	2	GPa
GLYCIN49	at 2.00 GPa	2	GPa
GLYCIN63	at 2 GPa	2	GPa
HXACAN10	at 2.0 GPa	2	GPa
KUDMON01	2000000.0 kPa	2	GPa
MEHNIY02	2.0 GPa	2	GPa
MENTIJ01	at 2.0 GPa	2	GPa
MIJBAK02	at 2 GPa	2	GPa
NAGHOT03	at 2.0 GPa	2	GPa
NTROMA06	at 2.0 GPa	2	GPa
NUYGOE03	at 2.00 GPa	2	GPa
PARZUG03	2000000.0 kPa	2	GPa
PYRDNO21	2000000.0 kPa	2	GPa
QQQCVS06	2 GPa	2	GPa
RIJKAZ01	2GPa	2	GPa
SALMID04	at 2.0 GPa	2	GPa
VASZIB	2.0 GPa	2	GPa
VOFVAN24	at 2.0 GPa	2	GPa
WIZMAV09	2000000.0 kPa	2	GPa
UJUJUF01	1.98 GPa	1.98	GPa
VUZLOT06	1.98 GPa	1.98	GPa
YARZUN02	at 1.98 GPa	1.98	GPa
TUVXAL03	1970000.0 kPa	1.97	GPa
XELFEC14	1.97 GPa	1.97	GPa
FUVDEH06	1.96 GPa	1.96	GPa
IQOMIM13	1960000.0 kPa	1.96	GPa
UJIXOC09	19.6 kbar	1.96	GPa
BOWRUC02	1.93 GPa	1.93	GPa
HEMTID14	1.93 GPa	1.93	GPa
OHIJAR04	at 1.93GPa	1.93	GPa
PEXNIQ05	1.93 GPa	1.93	GPa
YUXZIB08	1.93 GPa	1.93	GPa
ASUQAI09	1.92 GPa	1.92	GPa
BZDMAZ09	1.92(2) GPa	1.92	GPa
BZDMAZ24	1.92(2) GPa	1.92	GPa
NONWES54	1910000.0 kPa	1.91	GPa
YOLDAF04	at 1910000 kPa	1.91	GPa
AKEZIB03	1.90 GPa	1.9	GPa
BENZEN22	1.9 GPa	1.9	GPa
BOQQUT04	at 1900000 kPa	1.9	GPa
DADVAG04	1900000.0 kPa	1.9	GPa
DLSERN26	at 1.9 GPa	1.9	GPa
FACRIK04	at 1.90 GPa	1.9	GPa
GLYCIN67	at 1.9GPa	1.9	GPa
GLYCIN77	at 1.9 GPa	1.9	GPa
NAOXAL11	at 1.90 GPa	1.9	GPa
NAPHTA43	1.9 GPa	1.9	GPa
OKEZAH02	1900000.0 kPa	1.9	GPa
PUSBEM04	1900000.0 kPa	1.9	GPa
SOGFOL07	at 1900000 kPa	1.9	GPa
ETAGAJ	1.89 GPa	1.89	GPa
IBPRAC11	1.89 GPa	1.89	GPa
JAFBUO06	1.890 GPa	1.89	GPa
QAXMEH17	1.89 GPa	1.89	GPa
UJUKAM07	1.87 GPa	1.87	GPa
FOXNUB18	at 1870000.0 kPa	1.87	GPa
TOLUEN09	1870000.0 kPa	1.87	GPa
NEBGUX01	at 1.86 GPa	1.86	GPa
COXZAS46	1.85 GPa	1.85	GPa
GLYCIN53	at 1.85 GPa	1.85	GPa
IPIXUB13	1.85 GPa	1.85	GPa
MAGVOG09	at 1.85 GPa	1.85	GPa
QOSCUX	at 1.85GPa	1.85	GPa
SAZZID15	at 1.85 GPa	1.85	GPa
CEKGUU03	1850000.0 kPa	1.85	GPa
ABUMOZ06	1.84 GPa	1.84	GPa
LEFJAH04	at 1.84 GPa	1.84	GPa
OHAXIF02	at 1.84 GPa	1.84	GPa
MAPBTI18	1840000.0 kPa	1.84	GPa
MBRMET14	1830000.0 kPa	1.83	GPa
YIHHON06	1830000.0 kPa	1.83	GPa
POWSID03	1.82 GPa	1.82	GPa
SIMDAW02	1820000.0 kPa	1.82	GPa
ACEDAC14	1.81 GPa	1.81	GPa
ACRLAC20	1.81 GPa	1.81	GPa
NEVTIU04	1.81 GPa	1.81	GPa
AQETIA01	at 1.8 GPa	1.8	GPa
FOKNEY10	at 1.80 GPa	1.8	GPa
IZAKUR	1.80 GPa	1.8	GPa
JEFNUG03	1.8 GPa	1.8	GPa
LCYSTN27	at 1.8 GPa	1.8	GPa
LILRIJ01	1.8 GPa	1.8	GPa
LIQLIH11	at 1.8 GPa	1.8	GPa
MEWXOE01	1.8000000 GPa	1.8	GPa
NUVXAF	1.8 GPa	1.8	GPa
QOVXIK	1.8 GPa	1.8	GPa
SUVGEW	at 1.8 GPa	1.8	GPa
TAVKUX03	1.8 GPa	1.8	GPa
XAMDUM01	at 1.8 GPa	1.8	GPa
XELFEC01	1.80 GPa	1.8	GPa
BCBANN02	1800000.0 kPa	1.8	GPa
BCBANN13	1800000.0 kPa	1.8	GPa
DEHHEF01	1800000.0 kPa	1.8	GPa
GLUCSA14	1800000.0 kPa	1.8	GPa
SUCROS19	at 1800000.0 kPa	1.8	GPa
TIQDUT04	1800000.0 kPa	1.8	GPa
XAJMUS	at 1800000.0 kPa	1.8	GPa
EDELUX24	1.79 GPa	1.79	GPa
FEGHAA09	1.79 GPa	1.79	GPa
FUQLIM06	1.79 GPa	1.79	GPa
NEVTIU06	1.79 GPa	1.79	GPa
XELFEC06	1.79 GPa	1.79	GPa
ASUQAI08	1.78 GPa	1.78	GPa
MACUFR12	1.78 GPa	1.78	GPa
WAVFUW03	1.78 GPa	1.78	GPa
LAJLAL18	1.76 GPa	1.76	GPa
NEVTIU11	1.76 GPa	1.76	GPa
YOCZOG12	1.76 GPa	1.76	GPa
COXZAS02	1.75 GPa	1.75	GPa
EKESIY02	1.75 GPa	1.75	GPa
EKESIY06	1.75 GPa	1.75	GPa
NUYFIX03	at 1.75 GPa	1.75	GPa
PYRAZI03	1.75 GPa	1.75	GPa
SEHHIX15	at 1.75 GPa	1.75	GPa
THIOUR30	1.75 GPa	1.75	GPa
BOLDIP26	at 1730000.0 kPa	1.73	GPa
CABCUD18	1730000.0 kPa	1.73	GPa
MAWWAK11	at 1.73 GPa	1.73	GPa
BZDMAZ10	1.72(2) GPa	1.72	GPa
BZDMAZ23	1.72(2) GPa	1.72	GPa
EDUTAB04	1.72 GPa	1.72	GPa
IPIXUB14	1720000.0 kPa	1.72	GPa
YISBIM01	at 1.72 GPa	1.72	GPa
IFEPUG07	1.71 GPa	1.71	GPa
NONWES80	1710000.0 kPa	1.71	GPa
ACUWUQ06	1700000.0 kPa	1.7	GPa
GAFKOO06	1700000.0 kPa	1.7	GPa
GLYCIN76	at 1.7 GPa	1.7	GPa
GUMMUW08	at 1700000.0 kPa	1.7	GPa
IBPRAC10	1.7 GPa	1.7	GPa
LCYSTN26	at 1.7 GPa	1.7	GPa
PYRZOL32	at 1700000.0 kPa	1.7	GPa
REQCUO01	1700000.0 kPa	1.7	GPa
TMAMMN04	at 1700000 kPa	1.7	GPa
WEYQAU13	1.7 GPa	1.7	GPa
WIMFON02	at 1.7 GPa	1.7	GPa
ZEFJAX01	at 1.7 GPa	1.7	GPa
CLMETH02	1690000.0 kPa	1.69	GPa
HEMTID07	1.69 GPa	1.69	GPa
MOXJEP05	at 1690000 kPa	1.69	GPa
LUSCOR05	at 1.67 GPa	1.67	GPa
AZOCNI16	1.65 GPa	1.65	GPa
BECRUX03	1.65 GPa	1.65	GPa
COXZAS19	1.65 GPa	1.65	GPa
FEGHAA08	1.65 GPa	1.65	GPa
GLUTAS03	at 1.65 GPa	1.65	GPa
NUXJUM03	at 1650000.0 kPa	1.65	GPa
OBUQUZ11	1650000.0 kPa	1.65	GPa
WIZMAV08	1650000.0 kPa	1.65	GPa
XELFEC13	1.65 GPa	1.65	GPa
ACUWOK04	at 1640000 kPa	1.64	GPa
KOWYEA13	at 1640000.0 kPa	1.64	GPa
UTIXAX18	1.639 GPa	1.639	GPa
ACUWOK03	at 1630000 kPa	1.63	GPa
DCLMET12	at 1.63GPa	1.63	GPa
LSERIN31	at 1.613GPa	1.613	GPa
ZZZWEQ04	1.61 GPa	1.61	GPa
ADMANN07	1610000.0 kPa	1.61	GPa
QUTQIH03	1610000.0 kPa	1.61	GPa
JAFBUO05	1.603 GPa	1.603	GPa
HEXCET13	1.60 GPa	1.6	GPa
IMAZOL19	at 1.6 GPa	1.6	GPa
IMAZOL30	at 1.60 GPa	1.6	GPa
JEFJOW	1.6 GPa	1.6	GPa
KICCOO04	at 1.6 GPa	1.6	GPa
NIRJAA02	at 1.6 GPa	1.6	GPa
QEQXUI02	1.6 GPa	1.6	GPa
ESUSOC02	1600000.0 kPa	1.6	GPa
KIWXIZ01	1600000.0 kPa	1.6	GPa
LIZFIK04	at 1600000.0 kPa	1.6	GPa
OKEZAH01	1600000.0 kPa	1.6	GPa
OXACDH36	at 1600000.0 kPa	1.6	GPa
PEXNIQ04	1.59 GPa	1.59	GPa
YOSRUU11	at 1.59 GPa	1.59	GPa
ABUMOZ05	1.58 GPa	1.58	GPa
ASUQAI07	1.58 GPa	1.58	GPa
ACEDAC13	1.57 GPa	1.57	GPa
EDELUX23	1.57 GPa	1.57	GPa
HUCQED01	1.5700000 GPa	1.57	GPa
DIMETH14	at 1560000 kPa	1.56	GPa
NALCYS21	1560000.0 kPa	1.56	GPa
TOLUEN08	1560000.0 kPa	1.56	GPa
FEGHAA07	1.55 GPa	1.55	GPa
UJUKAM06	1.55 GPa	1.55	GPa
YICDIZ04	1.55 GPa	1.55	GPa
MBRMET13	1550000.0 kPa	1.55	GPa
AKEZIB02	1.53 GPa	1.53	GPa
FEROCE57	1530000.0 kPa	1.53	GPa
OHUGUU03	at 1.53 GPa	1.53	GPa
DADTUY10	1520000.0 kPa	1.52	GPa
FEGHAA06	1.52 GPa	1.52	GPa
IPIXUB05	1520000.0 kPa	1.52	GPa
QEYZAY03	1.5200000 GPa	1.52	GPa
QQQCVS05	1.52 GPa	1.52	GPa
YUQVUD	1.52 GPa	1.52	GPa
LETGIA10	at 1510000.0 kPa	1.51	GPa
YOCZOG11	1.51 GPa	1.51	GPa
AGABOA03	at 1500000.0 kPa	1.5	GPa
AKEYOG02	1.50 GPa	1.5	GPa
CARZIF03	at 1.5 GPa	1.5	GPa
CEKGUU02	1500000.0 kPa	1.5	GPa
CEYMAV04	at 1500000 kPa	1.5	GPa
CEYMAV07	at 1500000 kPa	1.5	GPa
DECWAJ02	at 1500000.0 kPa	1.5	GPa
DECWAJ09	at 1500000.0 kPa	1.5	GPa
DECWAJ10	at 1500000.0 kPa	1.5	GPa
DLALNI12	at 1.5 GPa	1.5	GPa
EFUMAU03	at 1500000 KPa	1.5	GPa
ETDIAM17	at 1.5 Gpa	1.5	GPa
HEGHUX	at 1.5GPa	1.5	GPa
HIXHIF	1.5 GPa	1.5	GPa
IMEGIR04	1.5 GPa	1.5	GPa
LALNIN27	at 1.5 GPa	1.5	GPa
MBRMET12	1500000.0 kPa	1.5	GPa
NAOXAL10	at 1.50 GPa	1.5	GPa
NURKOB	at 1.5 GPa	1.5	GPa
PASXIS02	at 1.50 GPa	1.5	GPa
QQQCIV08	at 1.50 GPa	1.5	GPa
RIJKAZ	1.5GPa	1.5	GPa
RIVDOQ03	at 1.5 GPa	1.5	GPa
TOLUEN07	1500000.0 kPa	1.5	GPa
UJUJUF10	1.50 GPa	1.5	GPa
UTIXAX02	at 1500000.0 kPa	1.5	GPa
XELFEC05	1.50 GPa	1.5	GPa
ACRLAC19	1.49 GPa	1.49	GPa
NEVSUF05	1.49 GPa	1.49	GPa
OHAVUQ04	1.49 GPa	1.49	GPa
QAXMEH16	1.49 GPa	1.49	GPa
AFUDEL03	at 1.48 GPa	1.48	GPa
UREAXX27	1.48(5) GPa	1.48	GPa
YESYAZ	1.48 GPa	1.48	GPa
YOMXUT06	1.48 GPa	1.48	GPa
TUDJOS	at 1.47 GPa	1.47	GPa
KANZEE07	1.46 GPa	1.46	GPa
VUZLOT01	1.46 GPa	1.46	GPa
MAPBTI17	1450000.0 kPa	1.45	GPa
SOFVUG04	1.45GPa	1.45	GPa
WABVIF01	at 1.45 GPa	1.45	GPa
MOXJEP04	at 1440000.0 kPa	1.44	GPa
BOWRUC04	1.43 GPa	1.43	GPa
MCBENZ	1.42 GPa	1.42	GPa
UTIXAX17	1.417 GPa	1.417	GPa
BZDMAZ11	1.41(2) GPa	1.41	GPa
BZDMAZ22	1.41(2) GPa	1.41	GPa
FEROCE42	1410000.0 kPa	1.41	GPa
FEROCE71	1410000.0 kPa	1.41	GPa
FUVDEH05	1.41 GPa	1.41	GPa
IMAZOL18	at 1.41 GPa	1.41	GPa
IZAKOL	1.41 GPa	1.41	GPa
NONWES88	1410000.0 kPa	1.41	GPa
YESXEC	1.41 GPa	1.41	GPa
YIHHON05	1410000.0 kPa	1.41	GPa
ABULIT03	at 1.4 GPa	1.4	GPa
AZOCNI15	1.40 GPa	1.4	GPa
BNPHTA08	1.40 GPa	1.4	GPa
COXZAS45	1.40 GPa	1.4	GPa
DADVAG03	1400000.0 kPa	1.4	GPa
EKESIY01	1.4 GPa	1.4	GPa
ESUVAR01	1400000.0 kPa	1.4	GPa
EVUQAO01	at 1.40 GPa	1.4	GPa
FAYCEP03	at 1400000 kPa	1.4	GPa
FEGHAA05	1.4 GPa	1.4	GPa
GLUTAM06	at 1.4 GPa	1.4	GPa
GLYGLY15	at 1.4 GPa	1.4	GPa
IMAZOL29	at 1.40 GPa	1.4	GPa
LCYSTI17	at 1.4GPa	1.4	GPa
LSERIN12	at 1.4GPa	1.4	GPa
NAKCEJ04	1400000.0 kPa	1.4	GPa
NIFPIE	1400000.0 kPa	1.4	GPa
NIFSUT	1400000.0 kPa	1.4	GPa
PRONAC02	at 1.4 GPa	1.4	GPa
SAZZID14	at 1.40 GPa	1.4	GPa
THIOUR29	1.40 GPa	1.4	GPa
UJUJUF09	1.40 GPa	1.4	GPa
WEMWEQ03	1400000.0 kPa	1.4	GPa
YIQGAH03	at 1.4 Gpa	1.4	GPa
GLYCIN50	at 1.39 GPa	1.39	GPa
PRMDIN21	1390000.0 kPa	1.39	GPa
SEHHIX14	at 1.39 GPa	1.39	GPa
FOXNUB17	at 1380000.0 kPa	1.38	GPa
IFEPUG06	1.38 GPa	1.38	GPa
IPIXUB04	1380000.0 kPa	1.38	GPa
IPIXUB16	1380000.0 kPa	1.38	GPa
JOHGIX05	at 1.38 GPa	1.38	GPa
LALNIN39	at 1.38 GPa	1.38	GPa
ONUTOI02	1.38 GPa	1.38	GPa
OHIJAR03	at 1.37GPa	1.37	GPa
CAFUMT05	1.36 GPa	1.36	GPa
DLMAND04	1.36 GPa	1.36	GPa
LAJLAL11	1.36 GPa	1.36	GPa
MAGVOG08	at 1.36 GPa	1.36	GPa
FIKKOC02	1360000.0 kPa	1.36	GPa
KOWYEA12	at 1360000.0 kPa	1.36	GPa
WAMJAW02	1.35 GPa	1.35	GPa
BOLDIP25	at 1350000.0 kPa	1.35	GPa
TOLUEN06	1350000.0 kPa	1.35	GPa
ERIMID13	1.34 GPa	1.34	GPa
UREAXX34	1.34 GPa	1.34	GPa
YARZUN01	at 1.34 GPa	1.34	GPa
DCLMET11	at 1.33GPa	1.33	GPa
CABCUD09	1330000.0 kPa	1.33	GPa
NIFQIF	1330000.0 kPa	1.33	GPa
RIBKES10	at 1330000.0 kPa	1.33	GPa
JAFBUO04	1.329 GPa	1.329	GPa
DADTOS14	1.32 GPa	1.32	GPa
GOFPUN02	at 1.31 GPa	1.31	GPa
MAWWAK10	at 1.31 GPa	1.31	GPa
NAPHTA44	1.31 GPa	1.31	GPa
CEDBUJ07	1.3 GPa	1.3	GPa
DEHHEF05	1300000.0 kPa	1.3	GPa
DLSERN25	at 1.3 GPa	1.3	GPa
ETEYAE	at 1300000.0 kPa	1.3	GPa
GLYCIN66	at 1.3 GPa	1.3	GPa
KETVEK03	at 1.3GPa	1.3	GPa
LIZFIK05	at 1300000.0 kPa	1.3	GPa
MEWXOE02	1.3000000 GPa	1.3	GPa
NIRJEE02	at 1.3 GPa	1.3	GPa
QQQAUG11	at 1.3 GPa	1.3	GPa
WUVSAH03	at 1300000.0 kPa	1.3	GPa
XAMDUM	at 1.3 GPa	1.3	GPa
XIKSAO	1300000.0 kPa	1.3	GPa
UTIXAX14	1.296 GPa	1.296	GPa
UTIXAX16	1.296 GPa	1.296	GPa
NIBSOG05	at 1.2925 GPa	1.2925	GPa
BINAPH22	1.29 GPa	1.29	GPa
KANZEE10	1.29 GPa	1.29	GPa
LENBOV02	at 1290000 kPa	1.29	GPa
ACEDAC12	1.28 GPa	1.28	GPa
IPIXUB11	1280000.0 kPa	1.28	GPa
JEXXAM03	1.28 GPa	1.28	GPa
DECWAJ08	at 1270000.0 kPa	1.27	GPa
DECWAJ13	at 1270000.0 kPa	1.27	GPa
DECWAJ14	at 1270000.0 kPa	1.27	GPa
FEGHAA04	1.27 GPa	1.27	GPa
POGJOM01	at 1270000.0 kPa	1.27	GPa
POGJOM02	at 1270000.0 kPa	1.27	GPa
TOLUEN05	1270000.0 kPa	1.27	GPa
UJUJUF08	1.27 GPa	1.27	GPa
BOJKAM03	1.26 GPa	1.26	GPa
EMIMOE01	1260000.0 kPa	1.26	GPa
GATLES02	at 1260000 kPa	1.26	GPa
GATLES12	at 1260000.0 kPa	1.26	GPa
PRMDIN20	1260000.0 kPa	1.26	GPa
ASUQAI06	1.25 GPa	1.25	GPa
HEMTID13	1.25 GPa	1.25	GPa
NIMRIK05	at 1.25 GPa	1.25	GPa
TUCZIB	at 1.25 GPa	1.25	GPa
AKEZIB01	1.24 GPa	1.24	GPa
EMITEB	1240000.0 kPa	1.24	GPa
ROMTUJ03	at 1240000 kPa	1.24	GPa
SIMDAW01	1240000.0 kPa	1.24	GPa
XELFEC12	1.24 GPa	1.24	GPa
BIHXIC09	1.23 GPa	1.23	GPa
IZAJUQ	1.23 GPa	1.23	GPa
NUYFIX02	at 1.23 GPa	1.23	GPa
PYRDNA06	at 1230000.0 kPa	1.23	GPa
CLMETH01	1220000.0 kPa	1.22	GPa
TMAMMN03	at 1220000 kPa	1.22	GPa
COXZAS18	1.21 GPa	1.21	GPa
EDELUX22	1.21 GPa	1.21	GPa
KECYBU07	at 1.21 GPa	1.21	GPa
QQQCIG25	1.21 GPa	1.21	GPa
YOCZOG10	1.21 GPa	1.21	GPa
UTIXAX13	1.206 GPa	1.206	GPa
UTIXAX15	1.206 GPa	1.206	GPa
AKEYOG01	1.20 GPa	1.2	GPa
BZDCPB15	1.2 GPa	1.2	GPa
CYSTAC04	at 1.2 GPa	1.2	GPa
DANTEN05	at 1.2 GPa	1.2	GPa
FIGYID01	at 1.2GPa	1.2	GPa
FORMAM04	at 1200000.0 kPa	1.2	GPa
IMAZOL27	at 1.20 GPa	1.2	GPa
IMAZOL28	at 1.20 GPa	1.2	GPa
KESYIQ03	at 1.2 GPa	1.2	GPa
LIQLIH10	at 1.2 GPa	1.2	GPa
NIFFIU	1200000.0 kPa	1.2	GPa
NIFSED	1200000.0 kPa	1.2	GPa
PUSBEM03	1200000.0 kPa	1.2	GPa
REQCIC03	1200000.0 kPa	1.2	GPa
RIJKAZ02	1.2GPa	1.2	GPa
ROMJUZ03	at 1.2 GPa	1.2	GPa
SUVGIA02	at 1.2 GPa	1.2	GPa
TAVKUX04	1.2 GPa	1.2	GPa
TIQDUT01	1200000.0 kPa	1.2	GPa
UBAQIA01	1.2 GPa	1.2	GPa
YOLDAF03	at 1200000 kPa	1.2	GPa
ZEFJAX	at 1.2 GPa	1.2	GPa
KENHUJ02	1.19 GPa	1.19	GPa
NEVTIU	1.19 GPa	1.19	GPa
PIWXEY05	at 1.19 GPa	1.19	GPa
BEDMIG13	at 1.18 GPa	1.18	GPa
LUSCOR04	at 1.18 GPa	1.18	GPa
PYRDNO20	1180000.0 kPa	1.18	GPa
TRIZIN06	1180000.0 kPa	1.18	GPa
ACRLAC18	1.17 GPa	1.17	GPa
RAYZEZ04	1.17 GPa	1.17	GPa
BINAPH21	1.16 GPa	1.16	GPa
MIMETH13	at 1.16GPa	1.16	GPa
NONWES53	1160000.0 kPa	1.16	GPa
PYRAZI09	1.16 GPa	1.16	GPa
MAGVOG07	at 1.15 GPa	1.15	GPa
MAWMIJ06	1.15(2) GPa	1.15	GPa
MECHLF14	at 1.15 GPa	1.15	GPa
OBUQUZ10	1150000.0 kPa	1.15	GPa
FACRIK03	at 1.14 GPa	1.14	GPa
FEROCE58	1140000.0 kPa	1.14	GPa
KOWYEA11	at 1140000.0 kPa	1.14	GPa
MACUFR11	1.14 GPa	1.14	GPa
NEDMIS02	1140000.0 kPa	1.14	GPa
YUJPOK01	1.14 GPa	1.14	GPa
VOLNOA07	1.138 GPa	1.138	GPa
BAJQUB08	1130000.0 kPa	1.13	GPa
EKESIY05	1.13 GPa	1.13	GPa
IFEPUG05	1.13 GPa	1.13	GPa
IZOXOL01	at 1.13GPa	1.13	GPa
UNIRUF06	1.12 GPa	1.12	GPa
GLUCSA12	1120000.0 kPa	1.12	GPa
MAPBTI11	1120000.0 kPa	1.12	GPa
WIZMAV07	1115000.0 kPa	1.115	GPa
COXZAS17	1.11 GPa	1.11	GPa
IMAZOL26	at 1.11 GPa	1.11	GPa
NUDPAE04	1.11 GPa	1.11	GPa
YOSRUU10	at 1.11 GPa	1.11	GPa
MBRMET11	1110000.0 kPa	1.11	GPa
BENZEN12	at 1.10 GPa	1.1	GPa
CEGFEA08	at 1.1 GPa	1.1	GPa
DLSERN24	at 1.1 GPa	1.1	GPa
DUSBEY08	1.1 GPa	1.1	GPa
ETDIAM16	at 1.10 Gpa	1.1	GPa
IMEGIR03	1.1 GPa	1.1	GPa
JEFPIW	1.10 GPa	1.1	GPa
MIJBAK01	at 1.1 GPa	1.1	GPa
NAGHOT02	at 1.1 GPa	1.1	GPa
OHAVUQ03	1.10 GPa	1.1	GPa
PIGQUS02	at 1.1 GPa	1.1	GPa
PYRDHN04	at 1.1GPa	1.1	GPa
PYRDNA03	at 1.1 GPa	1.1	GPa
RITNOY01	at 1.1 GPa	1.1	GPa
WAFNAT	at 1.1 GPa	1.1	GPa
CERKIU02	1100000.0 kPa	1.1	GPa
ESUSOC01	1100000.0 kPa	1.1	GPa
FEROCE85	1100000.0 kPa	1.1	GPa
LENBOV01	at 1100000 kPa	1.1	GPa
NAKCEJ03	1100000.0 kPa	1.1	GPa
NAKCIN04	1100000.0 kPa	1.1	GPa
NIFRIG	1100000.0 kPa	1.1	GPa
PARZUG04	1100000.0 kPa	1.1	GPa
TOLUEN04	1100000.0 kPa	1.1	GPa
URELIO02	1100000.0 kPa	1.1	GPa
URELIO03	1100000.0 kPa	1.1	GPa
URELIO04	1100000.0 kPa	1.1	GPa
URELIO05	1100000.0 kPa	1.1	GPa
CITSOP03	at 1.09 GPa	1.09	GPa
DLMAND05	1.09 GPa	1.09	GPa
ABUMOZ04	1.08 GPa	1.08	GPa
FUVDEH13	1.08 GPa	1.08	GPa
PYRAZI08	1.08 GPa	1.08	GPa
FEROCE70	1080000.0 kPa	1.08	GPa
HEMTID12	1.07 GPa	1.07	GPa
ISIYUF03	1.070 GPa	1.07	GPa
KANZEE09	1.07 GPa	1.07	GPa
NALCYS20	1070000.0 kPa	1.07	GPa
PRMDIN19	1070000.0 kPa	1.07	GPa
SIMDEA02	1070000.0 kPa	1.07	GPa
IZAJOK	1.06 GPa	1.06	GPa
PEXNIQ03	1.06 GPa	1.06	GPa
AXEZUA	1.05 GPa	1.05	GPa
BZDMAZ12	1.05(2) GPa	1.05	GPa
BZDMAZ21	1.05(2) GPa	1.05	GPa
NAOXAL09	at 1.05 GPa	1.05	GPa
NUXJUM02	at 1050000.0 kPa	1.05	GPa
PYRDNO19	1050000.0 kPa	1.05	GPa
TAWTAM06	1050000.0 kPa	1.05	GPa
FUVDEH04	1.04 GPa	1.04	GPa
KAMTAW06	1.04 GPa	1.04	GPa
MUTKUH02	1.04 GPa	1.04	GPa
YISBIM	at 1.04 GPa	1.04	GPa
NIFQEB	1035000.0 kPa	1.035	GPa
BOLDIP24	1.03 GPa	1.03	GPa
CAFUMT04	1.03 GPa	1.03	GPa
FOXNUB16	1.03 GPa	1.03	GPa
GEYREH02	1.03 GPa	1.03	GPa
LALNIN38	1.03 GPa	1.03	GPa
FAWFOY09	1.02 GPa	1.02	GPa
HQUACN06	1.02 GPa	1.02	GPa
PRMDIN18	1020000.0 kPa	1.02	GPa
UJIXOC08	10.2 kbar	1.02	GPa
CABCUD17	1010000.0 kPa	1.01	GPa
EDELUX21	1.01 GPa	1.01	GPa
IQOMIM11	1010000.0 kPa	1.01	GPa
IQOMIM12	1010000.0 kPa	1.01	GPa
MOXJEP03	1.01 GPa	1.01	GPa
UTIXAX12	1.009 GPa	1.009	GPa
ADMANN06	1000000.0 kPa	1	GPa
ADMNTB02	1 GPa	1	GPa
BOBVIY07	1 GPa	1	GPa
BPYRDB08	1.00(2) GPa	1	GPa
BZDCPB14	1 GPa	1	GPa
CAQQAP04	1000000.0 kPa	1	GPa
CEYMAV03	1 GPa	1	GPa
CEYMAV06	1 GPa	1	GPa
DLALNI11	1.0 GPa	1	GPa
EPZBNI04	1 GPa	1	GPa
ETEYEI	1 GPa	1	GPa
FUQLIM05	1 GPa	1	GPa
GAFKOO04	1000000.0 kPa	1	GPa
GAFKOO05	1000000.0 kPa	1	GPa
HQUACN05	1.0 GPa	1	GPa
HXACAN09	1.0 GPa	1	GPa
IFIZIG03	1.0 GPa	1	GPa
IPAVIG	1.00 GPa	1	GPa
JEKJOY06	1.00 GPa	1	GPa
KEKVIF02	1 GPa	1	GPa
LSERIN45	1.0 GPa	1	GPa
LSERMH11	1 GPa	1	GPa
MEHNIY01	1.0 GPa	1	GPa
MENTIJ	1.0 GPa	1	GPa
NAPHTA21	1.0 GPa	1	GPa
NEVTIU03	1.0 GPa	1	GPa
NIRJII03	1.0 GPa	1	GPa
NTROMA05	1.0 GPa	1	GPa
NUYGOE02	1.00 GPa	1	GPa
PENCEN10	1.00E-14 GPa	1	GPa
PENCEN11	1.00E-14 GPa	1	GPa
PENCEN12	1.00E-14 GPa	1	GPa
QEJPAX01	1 GPa	1	GPa
QEQYOD	1.0 GPa	1	GPa
QQQCVS04	1 GPa	1	GPa
REQCUO05	1.0000000 GPa	1	GPa
SACBAA02	1.0 GPa	1	GPa
SUCROS18	1 GPa	1	GPa
SUVGIA01	1.0 GPa	1	GPa
TEDRIG02	1 GPa	1	GPa
TRPAMN05	1.00 GPa	1	GPa
UBAPIZ05	1 GPa	1	GPa
UNUYOT05	1000000.0 kPa	1	GPa
UREAXX33	1.00 GPa	1	GPa
VOFVAN23	1.0 GPa	1	GPa
VUHTOI01	1.00 GPa	1	GPa
ZAKNIL05	1000000.0 kPa	1	GPa
LAJLAL10	0.99 GPa	0.99	GPa
QAXMEH15	0.99 GPa	0.99	GPa
YOCZOG09	0.99 GPa	0.99	GPa
YOMXUT05	0.99 GPa	0.99	GPa
JAFBUO28	0.986 GPa	0.986	GPa
ACEDAC11	0.98 GPa	0.98	GPa
BOWRUC06	0.98 GPa	0.98	GPa
HUCQED06	0.9800000 GPa	0.98	GPa
MESEFV05	at 980 MPa	0.98	GPa
NIBSOG04	at 0.971 GPa	0.971	GPa
BENZEN17	at 0.97(5) GPa	0.97	GPa
HEMTID06	0.97 GPa	0.97	GPa
QUTQIH02	970000.0 kPa	0.97	GPa
REMVOX01	970 MPa	0.97	GPa
THIOUR19	at 0.97GPa	0.97	GPa
ZEFPAD03	at 0.97GPa	0.97	GPa
AFUDEL02	at 0.96 GPa	0.96	GPa
FOKNEY09	at 0.96 GPa	0.96	GPa
PERJAZ	at 0.96 GPa	0.96	GPa
TUDJIM	at 0.96 GPa	0.96	GPa
BAJQUB07	950000.0 kPa	0.95	GPa
COXZAS16	0.95 GPa	0.95	GPa
DATREV01	0.95 GPa	0.95	GPa
ERIMID12	0.95 GPa	0.95	GPa
GLYCIN36	at 0.95 GPa	0.95	GPa
NEVSUF04	0.95 GPa	0.95	GPa
PASGOF02	at 0.95 GPa	0.95	GPa
ELUQIM11	at 0.94 GPa	0.94	GPa
FUVDEH03	0.94 GPa	0.94	GPa
IMAZOL17	at 0.94 GPa	0.94	GPa
KAMTAW05	0.94 GPa	0.94	GPa
LSERIN30	at 0.940GPa	0.94	GPa
QQQCCY08	0.94 GPa	0.94	GPa
JEXXAM02	0.93 GPa	0.93	GPa
XELFEC04	0.93 GPa	0.93	GPa
YICDIZ03	0.93 GPa	0.93	GPa
AKEZIB	0.92 GPa	0.92	GPa
MAGVOG06	at 0.92 GPa	0.92	GPa
FEROCE69	920000.0 kPa	0.92	GPa
BENZEN16	at 0.91(5) GPa	0.91	GPa
NEVTIU12	0.91 GPa	0.91	GPa
FUJMAZ02	at 910000.0 kPa	0.91	GPa
AZOCNI14	0.90 GPa	0.9	GPa
BISMEV08	at 0.9 GPa	0.9	GPa
DLSERN23	at 0.9 GPa	0.9	GPa
EDELUX20	0.90 GPa	0.9	GPa
FEGHAA03	0.9 GPa	0.9	GPa
GLYCIN75	at 0.9 GPa	0.9	GPa
GOFPUN01	at 0.90 GPa	0.9	GPa
IMAZOL25	at 0.9 GPa	0.9	GPa
LIQLIH09	at 0.9 GPa	0.9	GPa
OHUJUX02	at 0.9 GPa	0.9	GPa
POHYIV	at 0.90GPa	0.9	GPa
PRONAC03	at 0.9 GPa	0.9	GPa
QEYZAY02	0.9000000 GPa	0.9	GPa
QOVXEG	0.9 GPa	0.9	GPa
RIJKAZ03	0.9GPa	0.9	GPa
SEHHIX13	at 0.90 GPa	0.9	GPa
YIQGAH02	at 0.9Gpa	0.9	GPa
YUZTET	at 0.9 GPa	0.9	GPa
BOQQUT03	at 900000 kPa	0.9	GPa
CARGIM03	900000.0 kPa	0.9	GPa
ESUTIX	900000.0 kPa	0.9	GPa
ETEYIM	at 900000.0 kPa	0.9	GPa
HESREF03	900000.0 kPa	0.9	GPa
HESREF06	900000.0 kPa	0.9	GPa
HESREF07	900000.0 kPa	0.9	GPa
HESSOQ	900000.0 kPa	0.9	GPa
HOJYAI07	900000.0 kPa	0.9	GPa
HOJYAI08	900000.0 kPa	0.9	GPa
LIZFIK06	at 900000.0 kPa	0.9	GPa
PYRZOL33	at 900000.0 kPa	0.9	GPa
UJUKAM05	0.89 GPa	0.89	GPa
ABUMOZ03	0.88 GPa	0.88	GPa
EDUTAB03	0.88 GPa	0.88	GPa
FEROCE68	880000.0 kPa	0.88	GPa
FORMAM03	at 880000.0 kPa	0.88	GPa
GLUCSA11	880000.0 kPa	0.88	GPa
IBPRAC09	0.88 GPa	0.88	GPa
YESXUS	0.88 GPa	0.88	GPa
TUVXAL02	879000.0 kPa	0.879	GPa
ACRLAC17	0.87 GPa	0.87	GPa
OHAXIF01	at 0.87 GPa	0.87	GPa
THIOUR28	0.87 GPa	0.87	GPa
WIMFON03	at 0.87 GPa	0.87	GPa
YUXZIB07	0.87 GPa	0.87	GPa
DLMAND06	0.86 GPa	0.86	GPa
EPANIU01	0.86 GPa	0.86	GPa
KIWXIZ04	860000.0 kPa	0.86	GPa
LAJLAL09	0.86 GPa	0.86	GPa
PYRAZI07	0.86 GPa	0.86	GPa
VUHVEA01	at 0.86 GPa	0.86	GPa
XELFEC11	0.86 GPa	0.86	GPa
FAYCEP02	at 855000 kPa	0.855	GPa
BOQCUF12	at 0.85 GPa	0.85	GPa
IODOFO03	at 0.85 GPa	0.85	GPa
LEFJAH03	at 0.85 GPa	0.85	GPa
POWSID09	0.85 GPa	0.85	GPa
SAZZID13	at 0.85 GPa	0.85	GPa
VATSAK01	0.85 GPa	0.85	GPa
NEVTIU02	0.845 GPa	0.845	GPa
UTIXAX11	0.841 GPa	0.841	GPa
AKEYOG	0.84 GPa	0.84	GPa
ASUQAI05	0.84 GPa	0.84	GPa
BAZGOY02	at 0.84GPa	0.84	GPa
BAZGOY03	at 0.84GPa	0.84	GPa
MAPBTI12	840000.0 kPa	0.84	GPa
JAFBUO27	0.832 GPa	0.832	GPa
AGMANI04	at 830000.0 kPa	0.83	GPa
COXZAS15	0.83 GPa	0.83	GPa
NONWES87	830000.0 kPa	0.83	GPa
DADTUY09	820000.0 kPa	0.82	GPa
ELUQIM10	at 0.82 GPa	0.82	GPa
KOWYEA10	at 820000.0 kPa	0.82	GPa
RIBKES09	at 820000.0 kPa	0.82	GPa
TUDJUY	at 0.82 GPa	0.82	GPa
WIZMAV06	820000.0 kPa	0.82	GPa
KANZEE08	0.81 GPa	0.81	GPa
BEWWIK	at 0.8 GPa	0.8	GPa
CEDBUJ06	0.8 GPa	0.8	GPa
COXZAS41	0.80 GPa	0.8	GPa
COXZAS42	0.80 GPa	0.8	GPa
COXZAS44	0.80 GPa	0.8	GPa
DUSBEY07	0.8 GPa	0.8	GPa
GLUTAM05	at 0.8 GPa	0.8	GPa
IBPRAC08	0.8 GPa	0.8	GPa
IMAZOL23	at 0.8 GPa	0.8	GPa
IMAZOL24	at 0.8 GPa	0.8	GPa
JUYNUO	0.8 GPa	0.8	GPa
LALNIN26	at 0.8 GPa	0.8	GPa
LSERIN44	at 0.8 GPa	0.8	GPa
OHIJAR02	at 0.80GPa	0.8	GPa
OHUGUU02	at 0.8 GPa	0.8	GPa
TAVKUX05	0.8 GPa	0.8	GPa
THIOUR27	0.80 GPa	0.8	GPa
UREAXX28	0.80(5) GPa	0.8	GPa
DEHHEF04	800000.0 kPa	0.8	GPa
DIMETH15	at 800000 kPa	0.8	GPa
TAJWAF02	800000.0 kPa	0.8	GPa
WEMWEQ02	800000.0 kPa	0.8	GPa
LETGIA09	at 790000.0 kPa	0.79	GPa
SOGFOL01	at 790000 kPa	0.79	GPa
GLYCIN35	at 7.85 kbar	0.785	GPa
MAWWAK09	at 0.78 GPa	0.78	GPa
NAPHTA45	0.78 GPa	0.78	GPa
PASXIS03	at 0.78 GPa	0.78	GPa
WOLZAY02	at 0.78 GPa	0.78	GPa
BAJQUB06	780000.0 kPa	0.78	GPa
FOXNUB14	at 780000.0 kPa	0.78	GPa
FOXNUB15	at 780000.0 kPa	0.78	GPa
PYRDNO18	780000.0 kPa	0.78	GPa
WUVSAH02	at 780000.0 kPa	0.78	GPa
COXZAS14	0.77 GPa	0.77	GPa
LALNIN36	at 0.77 GPa	0.77	GPa
YIHHON04	770000.0 kPa	0.77	GPa
DLMAND07	0.76 GPa	0.76	GPa
KAMTAW04	0.76 GPa	0.76	GPa
MOXJEP02	at 760000.0 kPa	0.76	GPa
NIMRIK04	at 0.76 GPa	0.76	GPa
RASBEV	0.76 GPa	0.76	GPa
UJUJUF07	0.76 GPa	0.76	GPa
UNUYOT04	760000.0 kPa	0.76	GPa
CLFORM02	at 750000 kPa	0.75	GPa
EDELUX19	0.75 GPa	0.75	GPa
GUMMUW09	at 750000.0 kPa	0.75	GPa
MECHLF13	at 0.75 GPa	0.75	GPa
NIFQOL	750000.0 kPa	0.75	GPa
NIFSAZ	750000.0 kPa	0.75	GPa
SALOXM04	at 0.75 Gpa	0.75	GPa
MAGVOG05	at 0.74 GPa	0.74	GPa
NIFQAX	740000.0 kPa	0.74	GPa
PERJED	at 0.74 GPa	0.74	GPa
RIBKES07	at 740000.0 kPa	0.74	GPa
WANMUU02	at 0.74 GPa	0.74	GPa
EMIMOE02	730000.0 kPa	0.73	GPa
JOHGIX06	at 0.73 GPa	0.73	GPa
MAWMIJ05	0.73(2) GPa	0.73	GPa
PRMDIN17	730000.0 kPa	0.73	GPa
YETGIQ	0.73 GPa	0.73	GPa
FIKKOC01	720000.0 kPa	0.72	GPa
SEHHIX12	at 0.72 GPa	0.72	GPa
THIOUR26	0.72 GPa	0.72	GPa
ZEFPAD02	at 0.72 GPa	0.72	GPa
ASUQAI04	0.71 GPa	0.71	GPa
FAWFOY08	0.71 GPa	0.71	GPa
IPIXUB09	0.71 GPa	0.71	GPa
PRMDIN16	710000.0 kPa	0.71	GPa
PYRDNO17	710000.0 kPa	0.71	GPa
AWIHOE12	at 700000.0 kPa	0.7	GPa
BENZEN11	at 0.70 GPa	0.7	GPa
BINAPH20	0.70 GPa	0.7	GPa
BISMEV07	at 0.7 GPa	0.7	GPa
COXZAS13	0.70 GPa	0.7	GPa
DCLETH03	at 0.7 GPa	0.7	GPa
GLYCIN74	at 0.7 GPa	0.7	GPa
GOGJAN05	at 0.7 GPa	0.7	GPa
KADWIX04	0.70(5) GPa	0.7	GPa
KESYIQ02	at 0.7 GPa	0.7	GPa
KOWYEA06	at 700000.0 kPa	0.7	GPa
MACUFR10	0.70 GPa	0.7	GPa
MESEFV06	at 700 MPa	0.7	GPa
NIFPAW	700000.0 kPa	0.7	GPa
OBUQUZ09	700000.0 kPa	0.7	GPa
OHAVUQ02	0.70 GPa	0.7	GPa
PARZUG05	700000.0 kPa	0.7	GPa
PHENAN14	at 0.7 GPa	0.7	GPa
REQCIC02	700000.0 kPa	0.7	GPa
RIJKAZ05	0.7GPa	0.7	GPa
TAJVOS01	700000.0 kPa	0.7	GPa
TIGKOM	0.7 GPa	0.7	GPa
UBAPIZ	0.7 GPa	0.7	GPa
UBAPIZ01	0.7 GPa	0.7	GPa
WAMJAW01	0.7 GPa	0.7	GPa
WEYQAU12	0.7 GPa	0.7	GPa
YIQGAH01	at 0.7 Gpa	0.7	GPa
ACRLAC16	0.69 GPa	0.69	GPa
BACKIC	0.69 GPa	0.69	GPa
FEROCE59	690000.0 kPa	0.69	GPa
FUVDEH12	0.68 GPa	0.68	GPa
LETGIA08	at 680000.0 kPa	0.68	GPa
TMAMMN05	at 680000 kPa	0.68	GPa
UNIRUF05	680000.0 kPa	0.68	GPa
NIBSOG03	at 0.6725 GPa	0.6725	GPa
MAWMIJ04	0.672 GPa	0.672	GPa
ELUQIM09	at 0.67 GPa	0.67	GPa
ERIMID11	0.67 GPa	0.67	GPa
FOXNUB13	at 670000.0 kPa	0.67	GPa
UTIXAX10	0.662 GPa	0.662	GPa
HEMTID05	0.66 GPa	0.66	GPa
UJUJUF06	0.66 GPa	0.66	GPa
ACRLAC04	at 650000.0 kPa	0.65	GPa
DLMAND08	0.65 GPa	0.65	GPa
EDELUX18	0.65 GPa	0.65	GPa
MESEFV01	0.65 GPa	0.65	GPa
MESEFV11	at 650 MPa	0.65	GPa
OCRSOL02	at 0.65 GPa	0.65	GPa
OCUJOM02	at 0.65 GPa	0.65	GPa
PIWXEY04	at 0.65 GPa	0.65	GPa
YOCZOG08	0.65 GPa	0.65	GPa
YOSRUU09	at 0.65 GPa	0.65	GPa
BAJQUB05	640000.0 kPa	0.64	GPa
DUXSUK05	0.64 GPa	0.64	GPa
EKESIY04	0.64 GPa	0.64	GPa
KUBMAX03	640000.0 kPa	0.64	GPa
MUSVAZ	0.64 GPa	0.64	GPa
COXZAS40	0.63 GPa	0.63	GPa
GLYCIN59	at 0.63 GPa	0.63	GPa
HEMTID11	0.63 GPa	0.63	GPa
IFEPUG04	0.63 GPa	0.63	GPa
QQQCIV07	at 0.63 GPa	0.63	GPa
ZEFPAD01	at 0.63 GPa	0.63	GPa
BACKEY	0.62 GPa	0.62	GPa
BZDMAZ13	0.62(2) GPa	0.62	GPa
BZDMAZ20	0.62(2) GPa	0.62	GPa
CLFORM01	at 620000 kPa	0.62	GPa
DIMETH13	at 620000 kPa	0.62	GPa
HQUACN04	0.62 GPa	0.62	GPa
OMISIM	at 0.62GPa	0.62	GPa
THIOUR25	0.62 GPa	0.62	GPa
UHUTOH	at 0.62 GPa	0.62	GPa
DBRMET11	at 0.61Gpa	0.61	GPa
RASBIZ	0.61 GPa	0.61	GPa
VOBJEB02	at 610000.0 kPa	0.61	GPa
ACUXAX02	at 600000.0 kPa	0.6	GPa
COXZAS39	0.60 GPa	0.6	GPa
DICWAN08	600000.0 kPa	0.6	GPa
DLSERN22	at 0.6 GPa	0.6	GPa
EDELUX17	0.60 GPa	0.6	GPa
FEGHAA02	0.6 GPa	0.6	GPa
IBPRAC07	0.6 GPa	0.6	GPa
IPIXUB03	600000.0 kPa	0.6	GPa
KUDMON02	600000.0 kPa	0.6	GPa
LIFNOE	at 0.6 GPa	0.6	GPa
LIZFIK07	at 600000.0 kPa	0.6	GPa
LOCCAI06	0.60 GPa	0.6	GPa
MAGVOG04	at 0.60 GPa	0.6	GPa
MAWMIJ03	0.60 GPa	0.6	GPa
NAPHTA20	at 0.6 GPa	0.6	GPa
NTROMA04	at 0.6 GPa	0.6	GPa
ONUTOI01	0.60 GPa	0.6	GPa
PUSBEM02	600000.0 kPa	0.6	GPa
VOFVAN22	at 0.6 GPa	0.6	GPa
VUHTOI	at 0.60 GPa	0.6	GPa
YUJPOK	0.6 GPa	0.6	GPa
ZIGLOT	600000.0 kPa	0.6	GPa
OHIJAR01	at 0.59GPa	0.59	GPa
RIVDOQ02	at 0.59 GPa	0.59	GPa
SAZZID12	at 0.59 GPa	0.59	GPa
AZOCNI13	0.58 GPa	0.58	GPa
BOJKAM02	0.58 GPa	0.58	GPa
DADTOS13	0.58 GPa	0.58	GPa
ELUQIM08	at 0.58 GPa	0.58	GPa
GUHHAS03	at 0.58 GPa	0.58	GPa
IZOXOL	at 0.58GPa	0.58	GPa
JEFNUG02	0.58 GPa	0.58	GPa
QUTQIH01	580000.0 kPa	0.58	GPa
TIVWOL	at 0.58 GPa	0.58	GPa
XAVVIB01	0.58 GPa	0.58	GPa
BOLDIP23	at 570000.0 kPa	0.57	GPa
COKCEL	at 570000 kPa	0.57	GPa
LAJLAL08	0.57 GPa	0.57	GPa
QQQCIV06	at 0.57 GPa	0.57	GPa
[truncated: 716 more rows]
